1           **Title: TRF1 poly(ADP-ribosylation) by PARP1 allows proper telomere replication through**  
2 **helicase recruitment in non-ALT cells.**

3 **Authors:**

4           C. Maresca <sup>1†</sup>, A. Dello Stritto <sup>2†</sup>, C. D'Angelo <sup>1</sup>, E. Petti <sup>1</sup>, E. Vertecchi <sup>3</sup>, L. Pompili <sup>1</sup>, F.  
5 Berardinelli <sup>4</sup>, A. Sgura <sup>4</sup>, A. Antoccia <sup>4</sup>, G. Graziani <sup>5</sup>, A. Biroccio <sup>1\*</sup> and E. Salvati <sup>3\*</sup>.

6 **Affiliations:**

7           **1** Oncogenomics and Epigenetics Unit, IRCCS Regina Elena National Cancer Institute, Rome,  
8 Italy

9           **2** Department of Biology and Biotechnology "Charles Darwin", Sapienza University of  
10 Rome, Italy

11           **3** Institute of Molecular Biology and Pathology, National Research Council, Rome, Italy

12           **4** Department of Biology, Roma Tre University of Rome, Italy

13           **5** Department of Systems Medicine, University of Rome Tor Vergata, Rome, Italy

14

15           **†these authors contributed equally to this work**

16           **\*to whom correspondence should be addressed**

17           erica.salvati@cnr.it

18           annamaria.biroccio@ifo.gov.it

19

20 **Abstract**

21 Telomeres are nucleoprotein structures at eukaryotic chromosome termini. Their stability is  
22 preserved by a six-protein complex named shelterin. Among these, TRF1 binds telomere duplex  
23 and assists DNA replication with mechanisms only partly clarified. Poly (ADP-ribose) polymerase  
24 1 (PARP1) is a chromatin associated enzyme which adds poly (ADP-ribose) polymers (PARs) to  
25 acceptor proteins by covalent hetero-modification. Here we found that TRF1 is covalently  
26 PARylated by PARP1 during DNA synthesis. PARP1 downregulation perturbs bromodeoxyuridine  
27 incorporation at telomeres in S-phase, triggering replication-dependent DNA damage and  
28 telomere fragility. PARylated TRF1 recruits WRN and BLM helicases in S-phase in a PARP1-  
29 dependent manner, probably through non-covalent PAR binding to solve secondary structures  
30 during telomere replication. ALT telomeres are less affected by PARP1 downregulation and are  
31 less sensitive to PARP inhibitors. This work unveils an unprecedented role for PARP1 as a  
32 “surveillant” of telomere replication, in absence of exogenous DNA insults, which orchestrates  
33 protein dynamics at proceeding replication fork.

34

35

## 36 MAIN TEXT

### 37 Introduction

38 Telomeres are nucleoprotein structures at eukaryotic chromosomes termini deputed to DNA end  
39 protection. They are non-genic regions consisting of specie-specific GC rich repeats bound by a  
40 six-members specialized complex called shelterin, which regulates telomere length homeostasis  
41 and prevents undesired recombination by repressing different pathways of DNA damage  
42 response[1][2]. Telomere duplication initiates from a single origin of replication, located at sub-  
43 telomeres, moving unidirectionally towards chromosome end. To this end, proceeding replication  
44 forks must cope with the compaction of telomeric heterochromatin and the presence of  
45 secondary structures (t-loops and G-quadruplex). Thus, telomere replication requires the action  
46 of several enzymes that are enriched at telomeric loci (helicases, topoisomerases, exonucleases,  
47 and ligases). Among these, the Telomere Repeat Binding Factor 1 and 2 (TRF1-2) were shown to  
48 facilitate the recruitment of RecQ helicases at telomeres [3][4]. TRF1 and TRF2 are members of  
49 the shelterin complex that directly bind to telomeric duplex, as homodimers, in a sequence-  
50 specific manner. Moreover, they interact and recruit other shelterins and chromatin remodeling  
51 enzymes to assist DNA replication and repair [2]. TRF1 loss has been shown to slow down  
52 replication fork progression at telomeres, consequently causing telomere fragility [5][6]. This  
53 effect is partially explained by the fact that TRF1 recruits the Bloom (BLM) RecQ helicase to  
54 replicating chromatin assisting DNA replication [4]. TRF2 has been shown to have a crucial role in  
55 pericentromeric chromatin replication, where it binds to SatIII satellite repeats and recruit<sup>[EP1]</sup>s  
56 topoisomerase I action [7].

57 PARP1 is the most abundant protein at chromatin after histones. It is responsible for the addition  
58 of poly(ADP-ribose) polymers (PAR) on proteins in response to DNA damage, but, as confirmed by  
59 several studies, poly(ADP-ribosyl)ation (PARylation) is also involved in various cellular pathways  
60 including transcription and chromatin organization. The immediate and robust PAR synthesis  
61 produced locally at damaged sites modifies protein-protein and protein-DNA interactions and  
62 serves as a molecular scaffold for the subsequent recruitment of chromatin modulators and DNA  
63 repair proteins [8]. PARP1 is in fact necessary to activate different DNA repair pathways and its  
64 inhibition induces synthetic lethality in the presence of functional defects of master regulator of  
65 DNA repair (i.e., BRCA2) [9]. At telomeres, PARP1 is implicated in DNA damage repair through

66 activation of the alternative Non Homologous End Joining (alt-NHEJ) and Homologous  
67 Recombination (HR) [10]. Moreover, PARP1 interacts with and covalently modifies TRF2 [11].  
68 Telomere specific PARPs (Tankyrase 1 and 2) are known to modify TRF1 and regulate telomere  
69 elongation and sister chromatids separation during mitosis. PARP1 is also enriched at telomeric  
70 chromatin during G-quadruplex stabilization, to resolve replication-dependent damage [12][13].  
71 Here we investigate the constitutive role of PARP1 in difficult-to-replicate heterochromatin such  
72 as telomeric chromatin, in absence of DNA damage induction, unveiling a new role of this enzyme  
73 as a key modulator of protein dynamics at replicating telomeres.

74

75 **Results**

76 **PARP1 and TRF1 interact in S-phase in a DNA independent manner.**

77 Telomeres require the shelterin protein TRF1 for the replication fork progression. In mice, TRF1  
78 recruits the BLM helicase to assist DNA replication probably by removing secondary structures [4]  
79 in order to allow the replisome to passage. PARP1 cooperates with all five RecQ helicases to  
80 preserve genome integrity in replication stress conditions. [20] This led us to investigate if PARP1  
81 and TRF1 could interact, and if this interaction could be implicated in DNA replication. To this aim,  
82 HeLa cells were synchronized at the G1-S boundary by double thymidine blockade. Cell cycle  
83 synchronization during progression into S and G2-M phases was measured by flow cytometry in  
84 the total cell population (Figure 1 A ) and in BrdU pulsed cells to distinguish between early and  
85 mid/late S-phases of cell cycle, and the TRF1-PARP1 interaction was quantitatively assayed by co-  
86 immunoprecipitation at different time points after release (Figure 1 B). PARP1 was found  
87 immunoprecipitated by TRF1 and the affinity between the two proteins was found increased from  
88 the early S (time 0) to the mid-late S (2 hrs post release), while in G2-M (4 hrs post release) it  
89 returned to basal level (Figure 1 B). To ascertain whether PARP1 binding to TRF1 was dependent  
90 on the presence of DNA, co-immunoprecipitation experiments were performed in absence or in  
91 presence of ethidium bromide (EtBr, Figure 1 B). TRF1/PARP1 binding was strongly increased by  
92 EtBr addition, showing that this interaction did not require DNA; instead, TRF1/PARP1 interaction  
93 was increased in presence of EtBr, this could suggest that PARP1 had higher affinity for DNA-free  
94 TRF1, which abundance could be increased in presence of EtBr. To visualize a direct interaction  
95 between PARP1 and TRF1 *in-situ* in intact cells, PLA was performed (controls and experimental set  
96 up are shown in Figure S1), which revealed co-localization between proteins less than 40 nm far  
97 from each other, a distance at which two proteins are supposed to directly interact. PLA spots  
98 were detected in the nuclei of HeLa and analyzed by deconvolution microscopy (Figure 1 C). Signal  
99 quantification showed an increase in late S-phase cells, confirming the maximum of interaction  
100 during DNA replication (Figure 1 D).

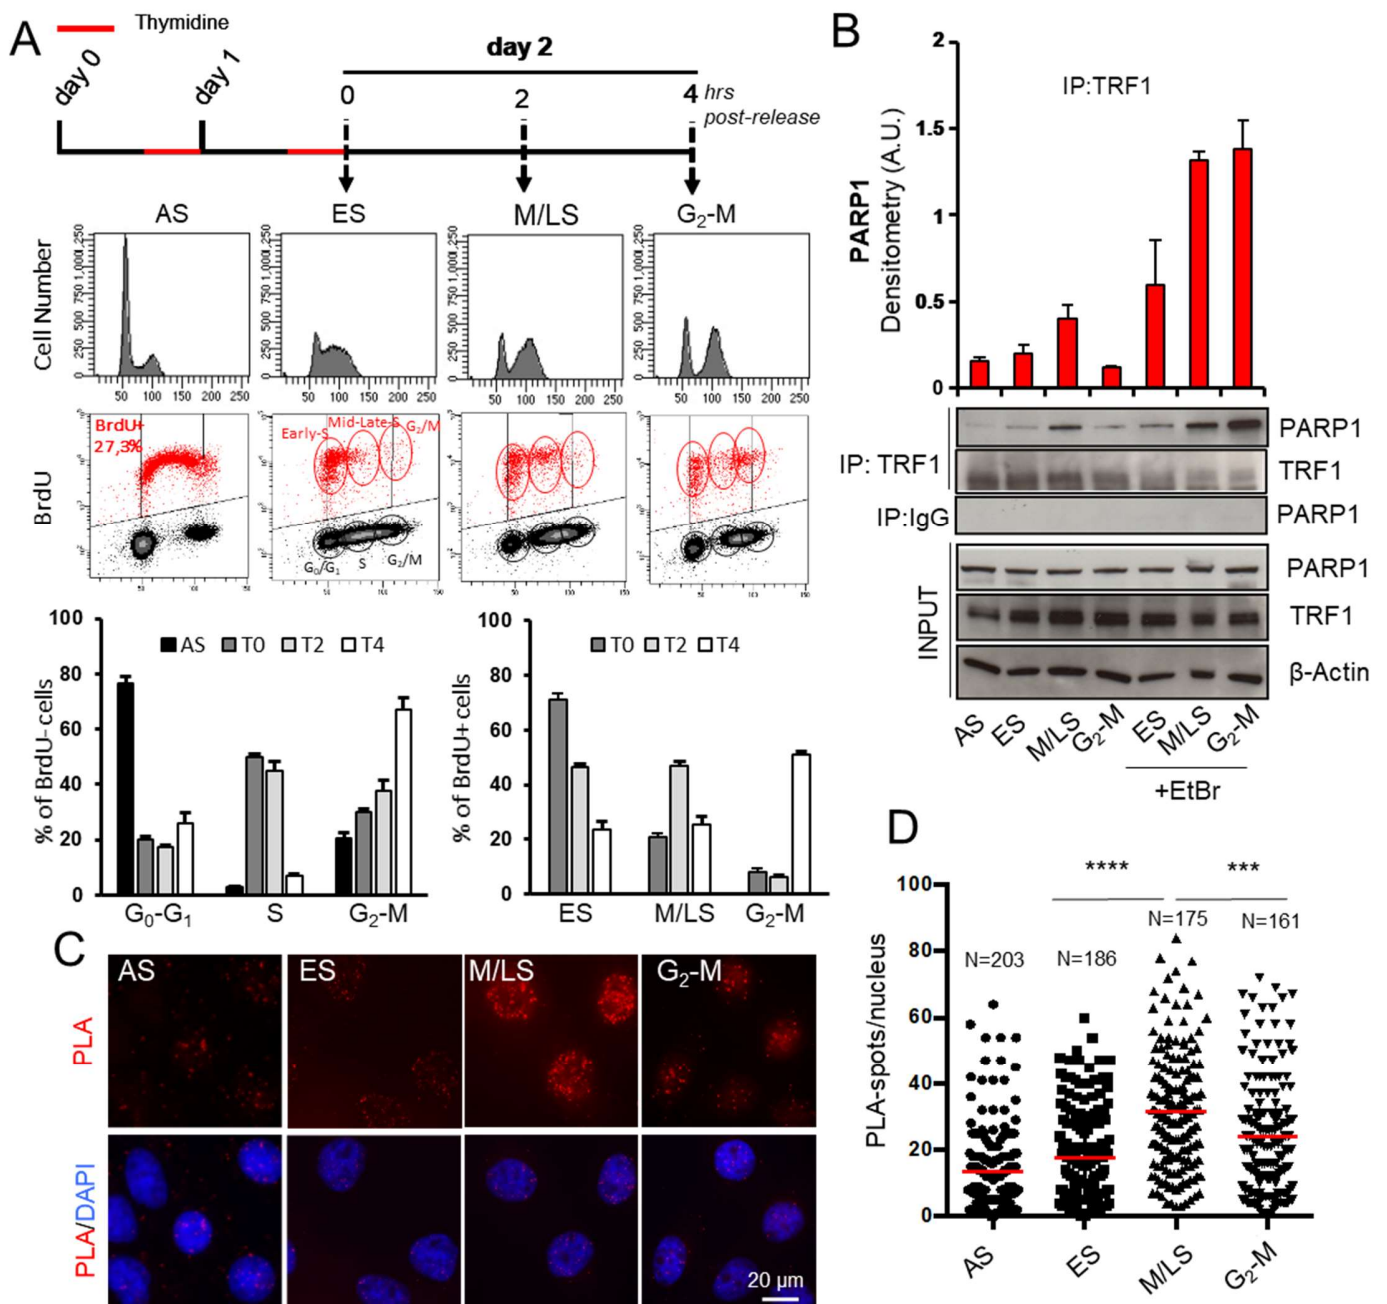

**Figure 1: TRF1 and PARP1 interact during S-phase.** HeLa cells were synchronized in the early S phase by double thymidine block and then released and collected at the indicated time points. A BrdU pulse was administered 15 minutes before the second thymidine block. Collected samples underwent cytofluorimetric analysis of the cell cycle phase distribution (A) or immunoprecipitation with an anti-TRF1 specific antibody or rabbit IgG as negative control (B) and decoration with the indicated antibodies (b-actin was used as loading control). Western blot signals were quantified by densitometry and reported in histograms after normalization on anti-PARP1 signals in the IgG immunoprecipitated samples, and anti-PARP1, TRF1 and b-actin signals in the input (B). One representative of three independent experiments is shown, bars are SD. C: HeLa cells synchronized as described were fixed in formaldehyde and processed for PLA with specific anti-TRF1 and PARP1 antibodies. Signals were acquired by Leica Deconvolution

101

102

103

104

105

106

107

108

109

110

111 fluorescence microscope at 63X magnification (in C representative images are shown). The number of signals/nucleus  
112 was scored and reported in graph (D). For each column Mean and numerosity (N) are indicated, two pulled  
113 independent experiments were plotted, P value was determined by unpaired two tailed t-student test, \*\*\*  $P \leq 0.001$ ,  
114 \*\*\*\*  $P \leq 0.0001$

### 115 **TRF1 is covalently PARylated by PARP1 *in-vitro*.**

116 PARP1 synthesizes linear and branched PARs from NAD<sup>+</sup> monomers, covalently linked to specific  
117 aminoacidic residues of PARP1 itself (homo-modification) or of specific target proteins (hetero-  
118 modification). To ascertain if TRF1 was directly modified by PARP1 enzyme, an *in-vitro* hetero-  
119 modification assay was performed in which recombinant TRF1 isoforms were added to PARP1  
120 enzyme in presence of NAD<sup>+</sup>. The protein mixture was resolved onto PAGE and PARs covalently  
121 bound to PARP1 and TRF1 were detected by western blot analysis with an anti-PAR specific  
122 antibody (Figure 2 A). Full-length recombinant TRF1 was PARylated by PARP1 as shown by the  
123 appearance of a smear at a lower molecular weight in samples in which TRF1 was added  
124 (overlapping with the anti-TRF1 detected band shown in the right panel), compared to PARP1  
125 signal alone. PARylation was further increased by cleaved DNA which stimulates PARP1 catalytic  
126 activity. TRF1 PARylation was also assessed by incorporation of biotinylated NAD<sup>+</sup> in the Poly ADP-  
127 ribose polymers, in the heteromodification assay, after detection with HRP conjugated anti-  
128 Streptavidin. As shown in Figure 2B, the NAD<sup>+</sup> incorporation is detected both at >100 KD (PARP1)  
129 and at 63KD (TRF1) when TRF1 is present, after biotin-NAD<sup>+</sup> addition. This result, besides showing  
130 that TRF1 is a PARP1 substrate for covalent PARylation, further confirms an unprecedented direct  
131 interaction between the two proteins. In a non-covalent PARylation assay, recombinant TRF1 was  
132 immobilized onto a nitrocellulose membrane together with the H1 histone (a known PARP1  
133 substrate of both covalent and non-covalent PARylation) and incubated with *in vitro* synthesized  
134 PARs, followed by anti-PAR detection. The dot-blot in Figure 2 C revealed that TRF1 is not a  
135 substrate for PARP1 non-covalent modification.

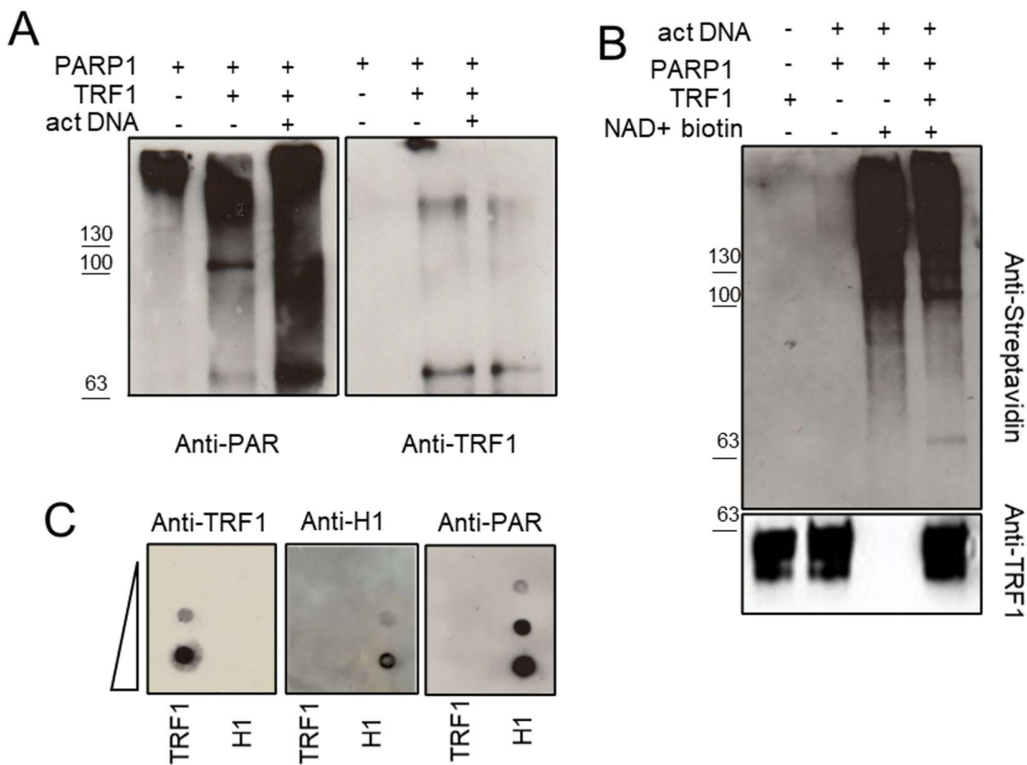

136

137 **Figure 2: TRF1 is covalently PARylated by PARP1 *in-vitro*.** A: high activity purified PARP1 enzyme was incubated with  
 138 unlabeled NAD+ (A and C) or biotin-labelled NAD+ (B) in the PARylation reaction buffer in absence or presence of  
 139 recombinant His-tag full length TRF1, with or without activating DNA (A). Protein mixtures were resolved on SDS-  
 140 PAGE and incubated with an anti-PAR antibody (A) or HRP-Streptavidin (B) to detect PARylated proteins and anti-His  
 141 or anti-TRF1 antibodies to detect TRF1 isoforms where present. Signals were revealed by chemiluminescence. C:  
 142 Noncovalent PARylation assay: increasing quantities of recombinant full length TRF1 or H1 histone were spotted on  
 143 nitrocellulose by dot blot, incubated with previously synthesized and purified PARs, and then decorated with anti-  
 144 PAR antibody (to detect bound polymers), anti-TRF1 and anti-H1 antibodies and revealed by chemiluminescence.

145

146 TRF1 PARylation was finally detected *in vivo* in HeLa cells transfected with siTRF1 or control  
 147 scrambled sequence (siSCR) and synchronized during progression through S-G<sub>2</sub>M phases of cell  
 148 cycle. Samples collected at different time points underwent anti-PAR immunoprecipitation and  
 149 detection with anti-TRF1 antibody. The anti-TRF1 blot in IP:PAR samples in Figure 3A clearly  
 150 showed a band which increased during the late S-phase, following the same trend of TRF1/PARP1  
 151 affinity (in Figure 1), that was missing in siTRF1 interference (checked in the input samples) and  
 152 IgG immunoprecipitated samples. PAR immunoprecipitation efficiency was controlled by  
 153 incubating the entire gels of input and IPed samples with the anti-PAR antibody that showed an



154 enrichment of PARylated proteins especially at low molecular weight (this is expected since  
155 histones are heavily PARylated). Interestingly, the immunoprecipitation with TRF1 and detection  
156 with anti-PAR in synchronized Hela cells, detected a band of the same molecular weight of TRF1  
157 with a similar trend of accumulation through S-phase progression that was dependent on the  
158 presence of PARP1 protein (Figure 3B and C). The presence of a Tankyrase1 PARs acceptor site in  
159 the acidic domain of TRF1 was already shown [21]. However, in heteromodification assay, the  
160 delta acidic mutant of TRF1 was PARylated with the same extent of the full-length protein,  
161 demonstrating that PARP1 heteromodification engages other domains. As a control, PARylation  
162 of both full-length and delta acidic TRF1 variants was inhibited by the PARP1 inhibitor olaparib  
163 (Supplemental figure 2). Of note, as shown in Figure 3D and E, Tankyrase1 affinity for TRF1 during  
164 cell cycle, had an inverse trend with respect to PARP1 binding, showing a decrease during S and  
165 G2-M phase progression. This indicates a chronological and physical separation between  
166 TRF1/Tankyrase1 and PARP1/TRF1 complexes formation suggesting a functional difference  
167 between Tankyrase1- and PARP1-dependent TRF1 PARylation, according with the evidence that  
168 TRF1 is PARylated in-vivo in S-phase by PARP1.

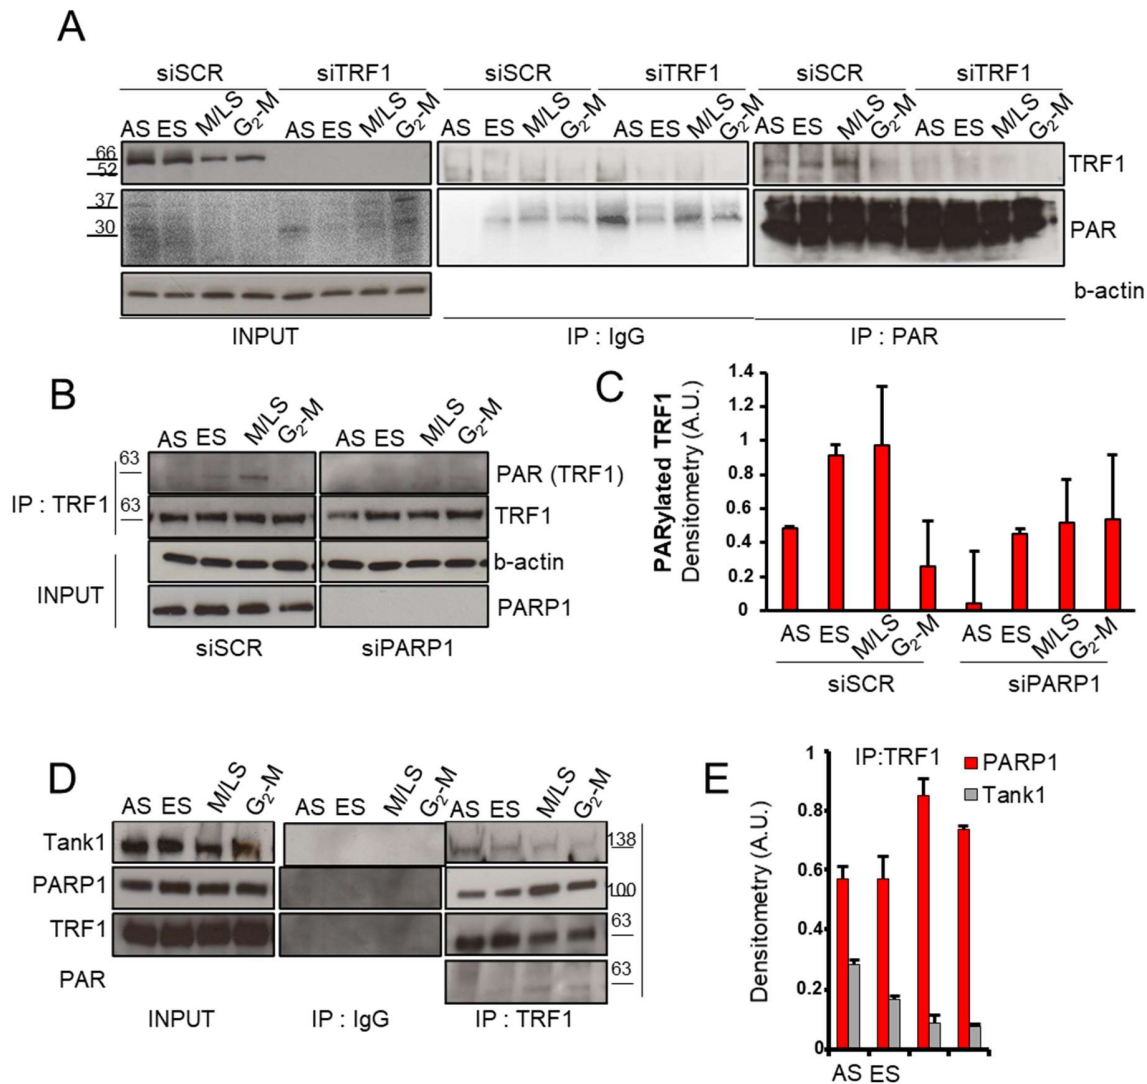

169

170 **Figure 3: TRF1 is PARylated *in-vivo* in S-phase in a PARP1 dependent manner.** HeLa cells were transfected where  
 171 indicated, then synchronized, collected and immunoprecipitated as above described with the indicated antibodies or  
 172 IgG as control. Input and immunoprecipitated samples were processed for Western blot analysis of the indicated  
 173 antigens. **C:** quantification of **B**, **E:** quantification of **D**. One representative of three independent experiments is shown,  
 174 bars are SD.

175 **TRF1 PARylation impacts on telomeric DNA replication.**

176 PARylation is known to alter the chemical environment of target proteins modifying their capacity  
 177 to interact with other proteins and/or nucleic acids. It has been shown that TRF1 has a peculiar  
 178 dynamic at telomeres during replication, detaching from chromatin during the replication fork  
 179 passage[22]. Since PARP1 interacts and PARylates covalently TRF1 during S-phase, we wanted to  
 180 ascertain if this interplay had a role in protein dynamics at replicating telomeres. To this aim, HeLa

181 cells were interfered for PARP1 or a scrambled sequence and synchronized in the early S by double  
182 thymidine blockade. Then, 1 h before sample collection, cells were exposed to BrdU incorporation  
183 as indicated in Figure 4A. Samples were collected at different time points and splitted for different  
184 analysis. They were subjected to cell cycle distribution analysis (Figure 4 A), ChIP against TRF1 or  
185 BromoIP assays to analyze TRF1 association to telomeric chromatin and replication fork passage  
186 respectively (Figure 4 B). As shown in Figure 4 B, in control samples, TRF1 association to telomeric  
187 chromatin was reduced in the early S and in the G<sub>2</sub>-M phases, as expected, compared to non-  
188 synchronized cells. At the same time points, a peak of BrdU incorporation was observed, coherent  
189 with the model that TRF1 detaches from chromatin during fork passage, and with the fact that  
190 telomeres are replicated in two different times of cell cycle [22]. Interestingly, PARP1 interference  
191 delayed both the TRF1 dissociation and the BrdU incorporation (Figure 4 B). Since RNAi strategy  
192 could result in a hypomorphic phenotype, the same results were confirmed by using the PARP1  
193 pharmacological inhibitors olaparib (Figure S3 A-C). At a dose unable to trigger DNA damage  
194 response activation (Figure S3 D), Olaparib treatment confirmed the lack of TRF1 dissociation and  
195 BrdU incorporation in the early S phase observed upon PARP1 interference. Since PARP1 depletion  
196 or inhibition seemed to impair TRF1 dissociation from chromatin, we deeper investigated the  
197 interplay between TRF1/PARP1 and telomeric duplex DNA. In the Electro Mobility Shift Assay  
198 shown in Figure 4 D, unmodified TRF1 efficiently bound <sup>32</sup>P-labelled telomeric duplex DNA, but  
199 the binding was massively decreased by the previous heteromodification of TRF1 by PARP1  
200 enzyme. As a control, PARP1 alone did not affect DNA migration. Although FACS analysis in Figure  
201 4 A failed to reveal differences in cell cycle distribution between control and PARP1 interfered  
202 population, a more accurate analysis of S-phase length by the BrdU pulse experiment in Figure 4  
203 C clearly shows that PARP1 interfered cells incorporated less BrdU and had a delayed S-phase exit.  
204 This is coherent with a localized impairment of DNA synthesis able to slow down S-phase exit but  
205 without effect on the whole population cell cycle distribution.

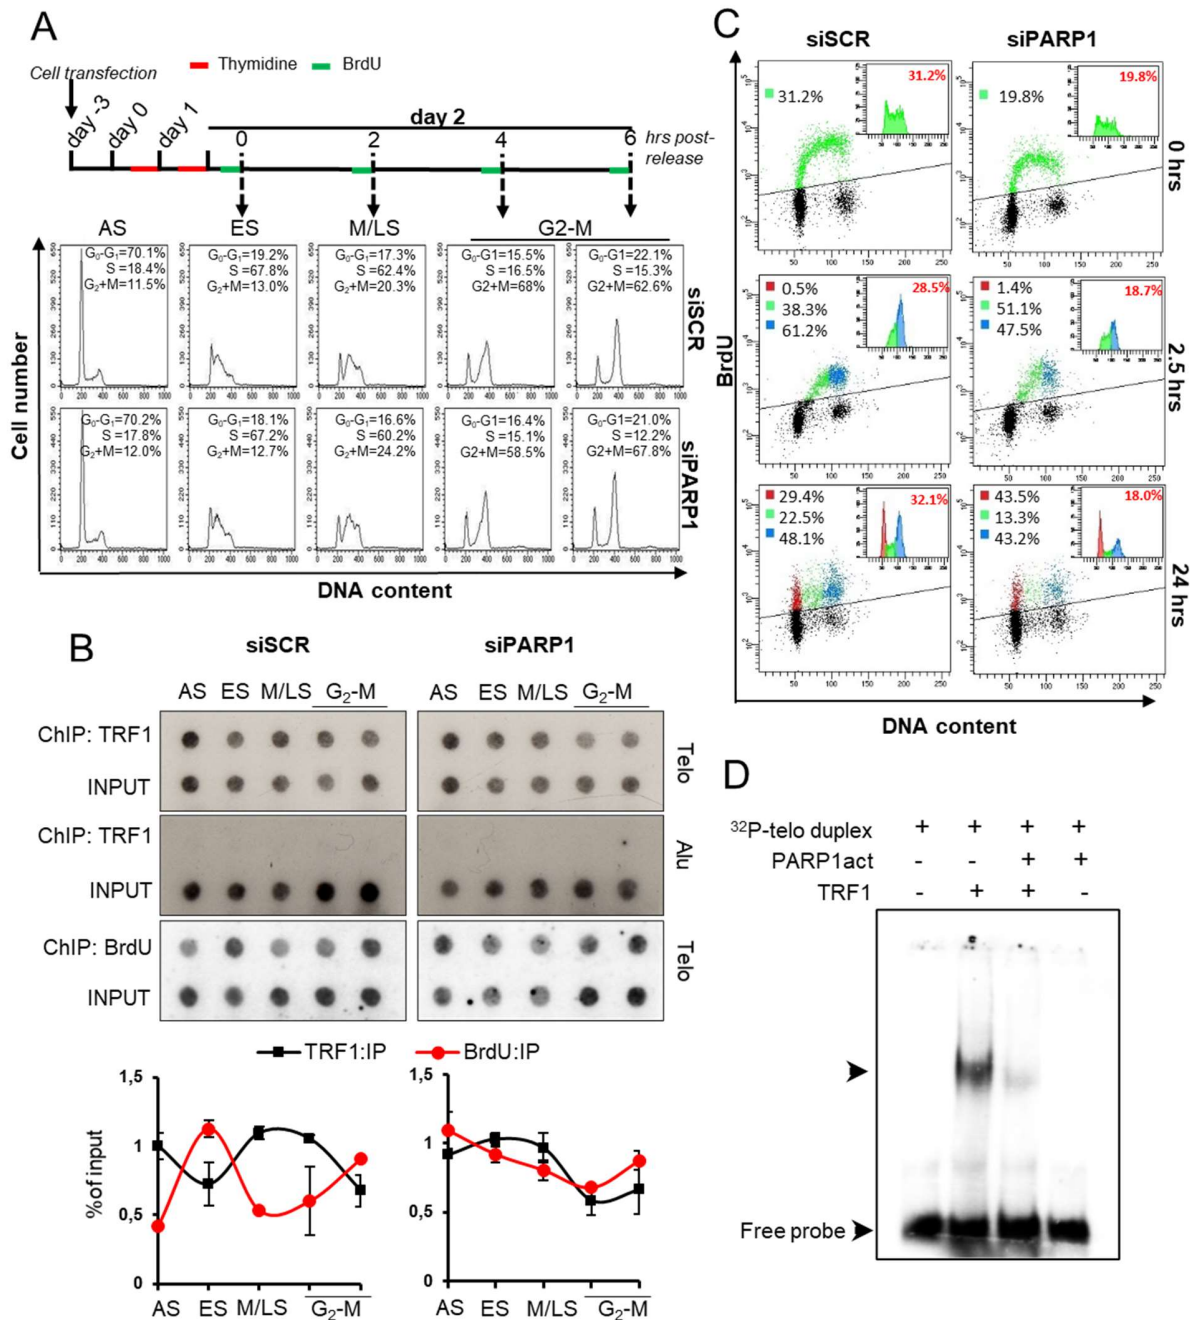

206

207

208

209

210

211

212

213

214

215

**Figure 4: PARP1 inhibition perturbs DNA synthesis and TRF1 dynamics at telomeres in S-phase.** HeLa cells were transfected with siSCR and siPARP1 RNAs, synchronized by double thymidine block as above described and one hour before collection were exposed to BrdU incorporation (A). Samples were collected, splitted and processed for FACS analysis (A), one representative of three independent experiments is shown, and ChIP against TRF1 or BrdU IP (B). Immunoprecipitated chromatin was dot blotted and hybridized with a radiolabeled probe against telomere repeats or Alu repeats (B) One representative of three independent experiments with similar results is shown. Immunoprecipitated samples signals were quantified by densitometry, normalized on each relative input (1:100) and Alu signal (where present) and then reported as the percentage of immunoprecipitated chromatin (B). Curves report the mean of three independent experiments, bars are SD. C: Bivariate distributions (dot plot) of BrdU (Alexa Fluor

216 488) content versus DNA (PI) content were analyzed. HeLa cells interfered as above described were pulsed with BrdU  
217 for 15 min, and after the indicated intervals in BrdU-free medium the DNA was denatured, incubated with anti-BrdU  
218 antibody and staining DNA. BrdU<sup>-</sup> (black area) and BrdU<sup>+</sup> (multicolor area) populations were separated by analytical  
219 sorter in bi-parametric distribution and graph insert on top-right show DNA content of BrdU-positive cells, the  
220 percentage of positivity at each time point is reported in red inside the box. Flow cytometry data analysis is built upon  
221 the principle of gating and the percentages of G0-G1 (red) S (green) and G2+M (blue) was reported inside the dot  
222 plot. One representative of three independent experiments with similar results is shown. **D:** EMSA assay,  
223 radiolabelled DNA was incubated with unmodified or PARP1 PARylated TRF1 and run on nondenaturing  
224 polyacrylamide gel. Signals were acquired at the Phosphoimager.

### 225 **PARP1 inhibition induces transient DNA damage in telomerase positive cells but not in ALT cells.**

226 The impairment of replication fork progression at telomeres is expected to give rise to a transient  
227 activation of DNA damage response (DDR), revealed by the activation of  $\gamma$ H2AX foci, due to the  
228 presence of single stranded DNA lesions in proximity to paused or stalled replication forks.  
229 Therefore, the expression of the above marker was analyzed at different time points after PARP1  
230 down-regulation (via RNAi) in comparison with TRF1 down-regulation, as a control of telomere  
231 replication perturbation, in both HeLa and U2OS cell lines, the first with telomerase activity and  
232 the last adopting alternative telomere elongation mechanisms (ALT) involving the break-induced  
233 DNA synthesis. The effect of the double interferences was also analyzed to ascertain whether  
234 PARP1 and TRF1 were acting in the same pathway (Figure 5 A-C). The single cell analysis by  
235 immunofluorescence-FISH co-staining of telomeric DNA and phosphorylated  $\gamma$ H2AX, showed a  
236 transient increase of the percentage of  $\gamma$ H2AX positive cells (Figure S4) and of TIFs (recognized as  
237  $\gamma$ H2AX/telomere colocalizations) positive nuclei in both TRF1 and PARP1 interfered samples in  
238 HeLa cells that were recovered at 72 h after interference. In addition, in double interfered  
239 samples, TIFs positive cell percentages were like the TRF1 single interfered samples, indicating  
240 that PARP1 and TRF1 acts epistatically (Figure 5 A and B and Figure S4 A and B). Interestingly, in  
241 U2OS cells, the PARP1 interference was almost ineffective both alone and in combination with  
242 siTRF1 (Figure S4 A and C and Figure 5 A and C). The extent of protein down-regulation achieved  
243 by interference is shown in Figure S4D.

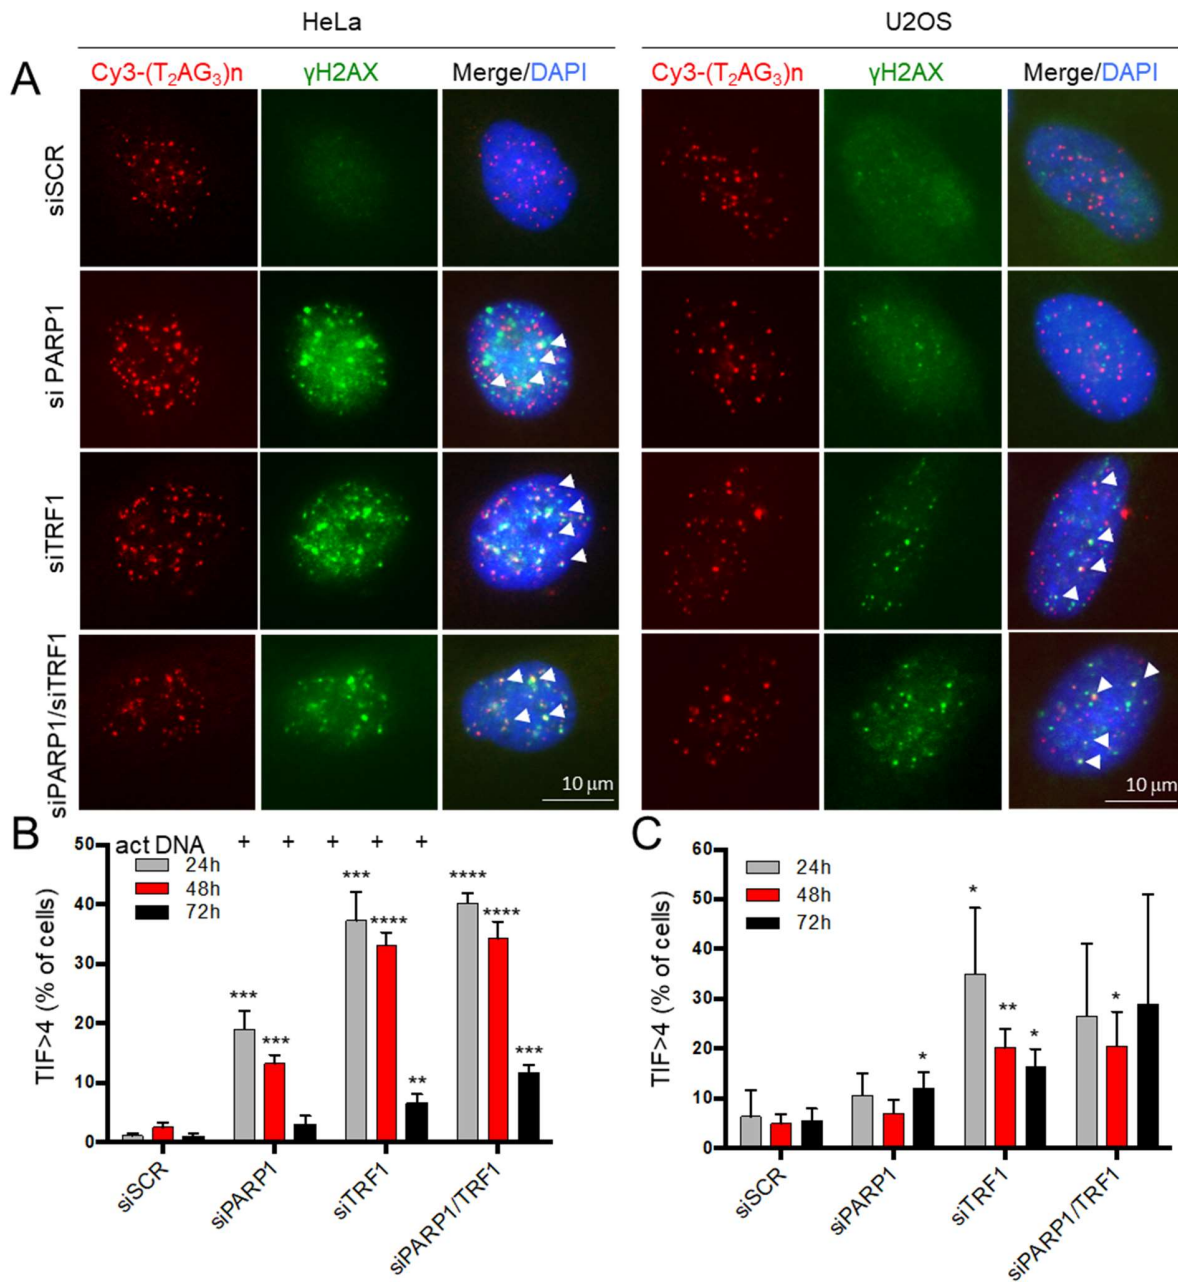

244

245 **Figure 5: PARP1 inhibition causes transient DNA damage at telomeres in non-ALT cells.** HeLa and U2OS cells were  
 246 transfected with siRNAs against siPARP1 and siTRF1 alone and in combination and against a scrambled sequence.  
 247 Then samples were fixed at the indicated endpoints after transfection and processed for IF-FISH against γH2AX and  
 248 telomere repeats with a Cy3-Telo PNA probe and counterstained with DAPI. Signals were acquired by Leica  
 249 Deconvolution fluorescence microscope at 63X magnification, representative images are shown in panel A. The  
 250 percentage of TIFs positive cells (displaying >4 γH2AX/telomere co-localizations) in HeLa and U2OS cells was scored  
 251 and reported in histograms in B and C, respectively. The average of three independent experiments is shown, bars  
 252 are SD. Bars are SD. \*P≤0.05, \*\* P ≤ 0.01, \*\*\* P ≤ 0.001, \*\*\*\* P ≤ 0.0001.

253 **PARP1 inhibition causes replication-dependent DNA damage and telomeric fragile sites in non-**  
254 **ALT cells by interfering with helicase recruitment.**

255 The transient nature of telomeric damage observed upon PARP1 inhibition/interference underlies  
256 the activation of DNA repair to resolve fork pausing/stalling. To ascertain if the DNA damage  
257 induction observed upon PARP1 interference was due to replication perturbation, we analyzed  
258 the activation of pRPA(S4/S8), which is considered as a marker of forks collapse, at telomeres. The  
259 percentage of pRPA/telomere colocalization positive cells increased in both TRF1 and PARP1  
260 depleted cells, indicating that telomeric DNA damage was due to replication defects undergoing  
261 repair, and, of note, the double interference failed to show further increase (Figure 6 A and B).  
262 Replication stress at telomeres is known to generate a phenotype of telomere fragility,  
263 recognizable by the presence of double telomeric spot at a single chromatid in telo-FISH assay.  
264 Consistently with this finding, PARP1 interference (Figure 6 C and D), as well as pharmacological  
265 inhibition (Figure S3 E-F), were able to induce a significant increase of telomere fragile sites,  
266 comparable to the TRF1 interference. Also, in this case, the double TRF1/PARP1 knock-down  
267 displayed a similar result compared to the PARP1 knock-down. Neither TRF1, nor PARP1 or their  
268 combination affected telomere length (Figure 6E and S5 A). Other kind of telomere aberrations,  
269 not related to telomere replication (i.e. telomere fusions and dicentric chromosomes) were scored  
270 without finding any significant increase with respect to control sample (Figure S5 B).

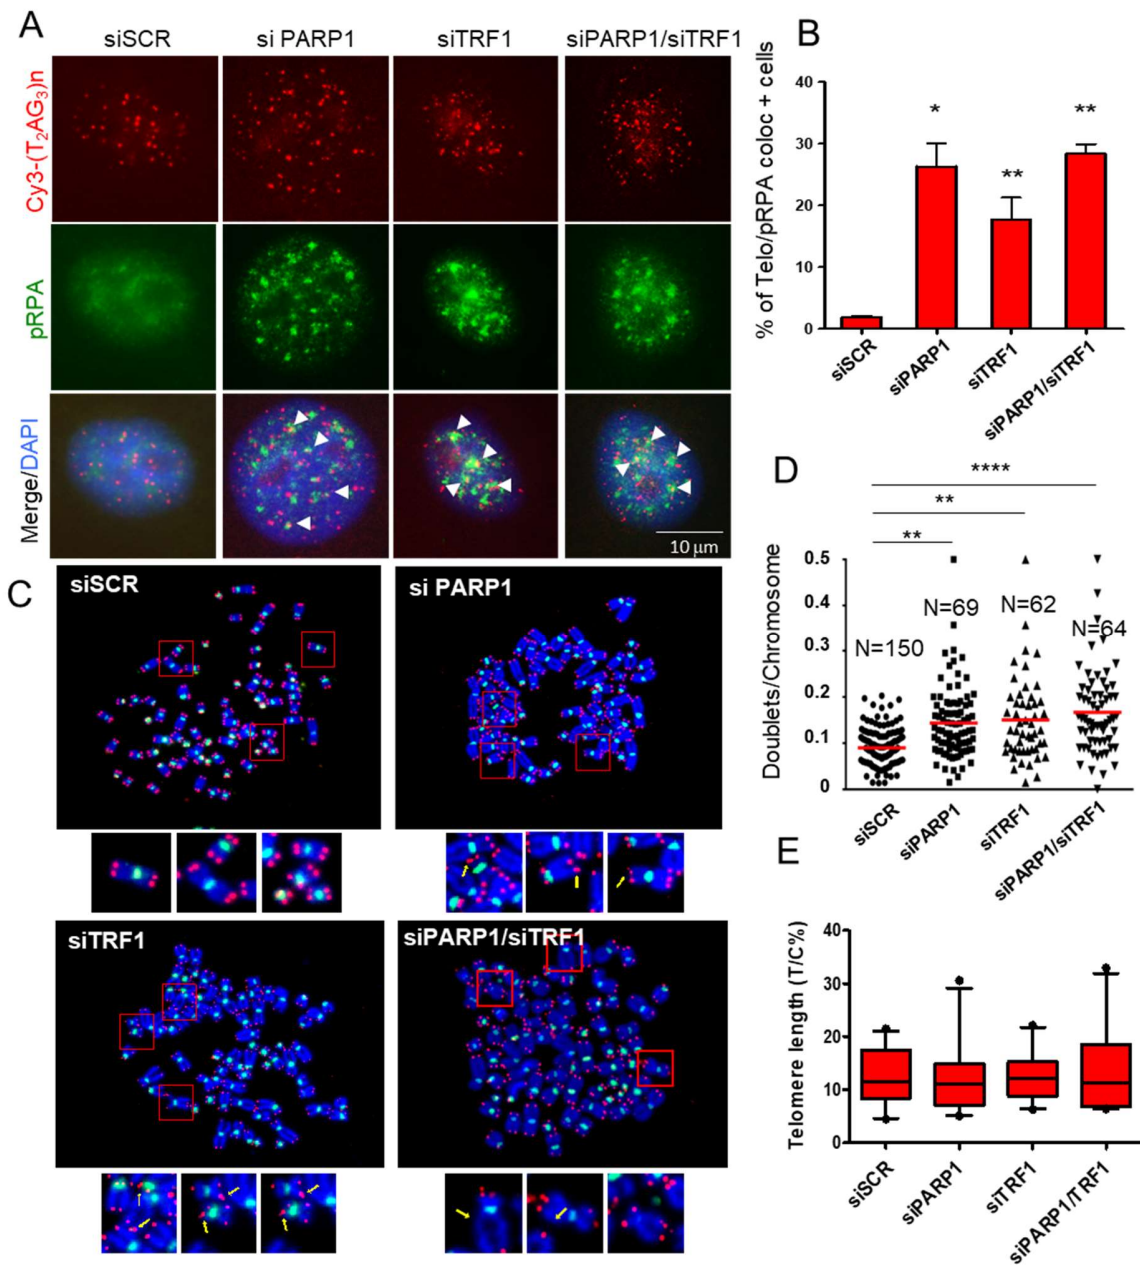

271

272 **Figure 6: PARP1 inhibition induces telomere replication defects.** HeLa cells were interfered and fixed as above  
 273 indicated, and then processed for IF-FISH against pRPA and telomere repeats with a Cy3-Telo PNA probe and  
 274 counterstained with DAPI. Signals were acquired by Leica Deconvolution fluorescence microscope at 63X  
 275 magnification (representative images are shown in panel A). Telomere/pRPA colocalizations were scored and the  
 276 percentage of positive cells (displaying >4 colocalizations) was reported in histograms (B). HeLa were transfected as  
 277 above and after 72 hours metaphases were collected and processed for fish for pantelomeric/pancentromeric  
 278 staining and counterstained with DAPI. Representative images at 100X magnification are shown in C. D: Telomere  
 279 doublets were scored and reported in graphs as the percentage of doublets/chromosomes Two pulled independent  
 280 experiments were plotted; E: Q-FISH analysis of telomere length on the same metaphases. P value was determined  
 281 by unpaired two tailed t-student test. \*\* P ≤ 0.01, \*\*\*\* P ≤ 0.0001.



282 In agreement with the lack of TIFs induction upon siTRF1 and siPARP1 interference, U2OS cells  
283 were also resistant to the induction of telomere fragility (Figure 7A and B). Interestingly,  
284 pharmacological PARP1 inhibition by olaparib had different effects on HeLa and U2OS cells which  
285 displayed a significantly different IC<sub>50</sub> to the PARPi (Figure S9). By extending the analysis to other  
286 cell lines of different histological origin, previously characterized for the presence of ALT  
287 mechanisms, we discovered that ALT cells displayed lower sensitivity to olaparib cytotoxic effects  
288 (Figure 7 C and Figure S9).

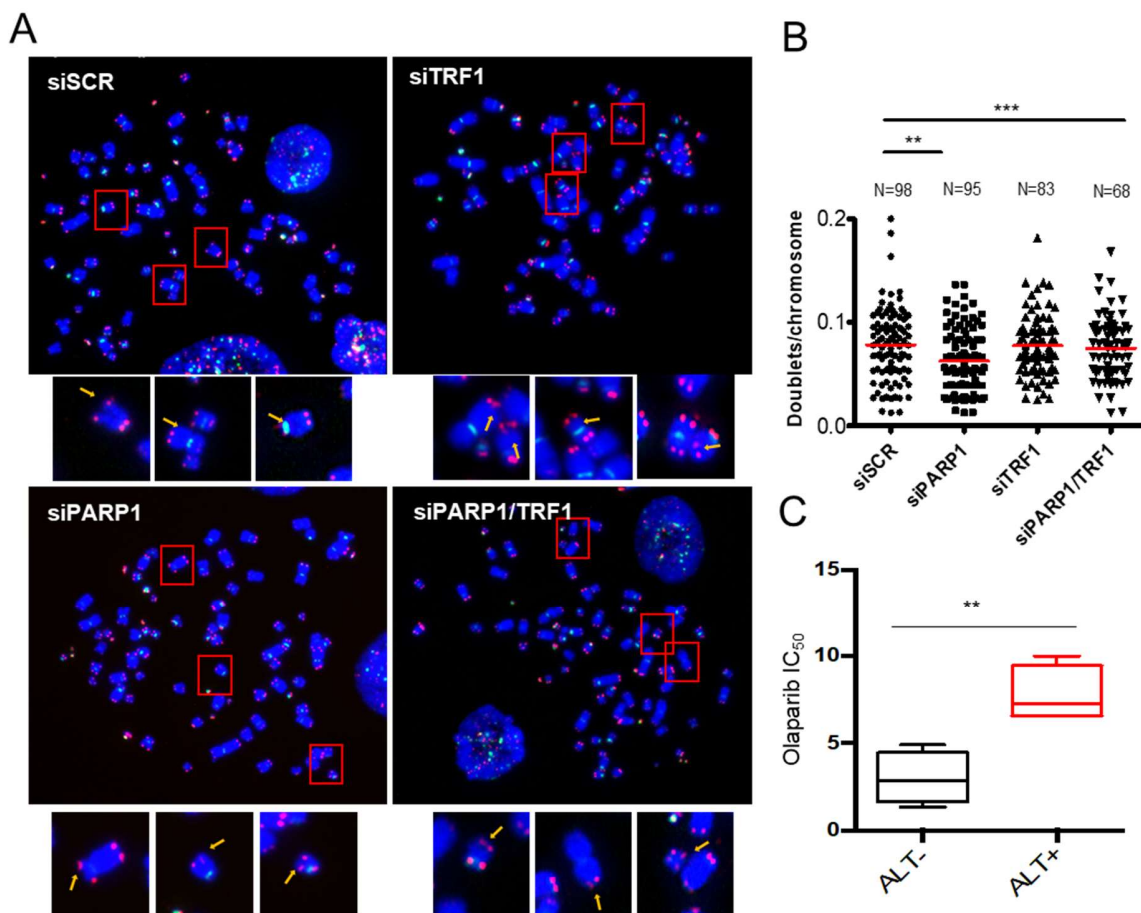

289

290 **Figure 7: ALT cells are resistant to fragility induced by siTRF1 and siPARP1 and are less sensitive to Olaparib**  
291 **treatment.** U2OS cells were transfected with siRNAs against siPARP1 and siTRF1 alone and in combination and against  
292 a scrambled sequence and after 72 hours metaphases were collected and processed for FISH for  
293 pantelomeric/pancentromeric staining and counterstained with DAPI. Representative images at 100X magnification  
294 are shown in A. B: Telomere doublets were scored and reported in graphs as the percentage of  
295 doublets/chromosomes. Two pulled independent experiments were plotted, bars are means; C: ALT and non-ALT cell  
296 lines (4 cell lines for each group) were exposed to olaparib concentrations ranging from 0.5 to 10 mM for 7 days. Cell  
297 survival was determined by crystal violet and IC<sub>50</sub> was calculated and reported in boxplots. Bars are SD. \*P<0.05, \*\*  
298 P ≤ 0.01, \*\*\* P ≤ 0.001, \*\*\*\* P ≤ 0.0001.

299 The mechanisms underlying telomere doublets formation is not completely clarified. It was  
300 already shown that TRF1 recruits the activity of BLM RecQ helicase to resolve topological stress at  
301 replicating telomeres and the lack of BLM recruitment by TRF1 is responsible for telomere fragility  
302 phenotype [4]. Here we show that TRF1 co-immunoprecipitated also with WRN, another RecQ  
303 helicase (Figure 8 A and B). More interestingly, both the RecQ helicases are recruited by TRF1 in a  
304 PARP1 dependent manner in S-phase (Figure 8 A and B). CHIP analysis of WRN association to  
305 telomeric chromatin during S-phase showed a peak in early S-phase, that was completely  
306 abrogated in PARP1 interfered cells (Figure 8 C and D). The lack of WRN recruitment explains the  
307 inability of cells with downregulated PARP1 to complete telomere replication and the formation  
308 of fragile sites.

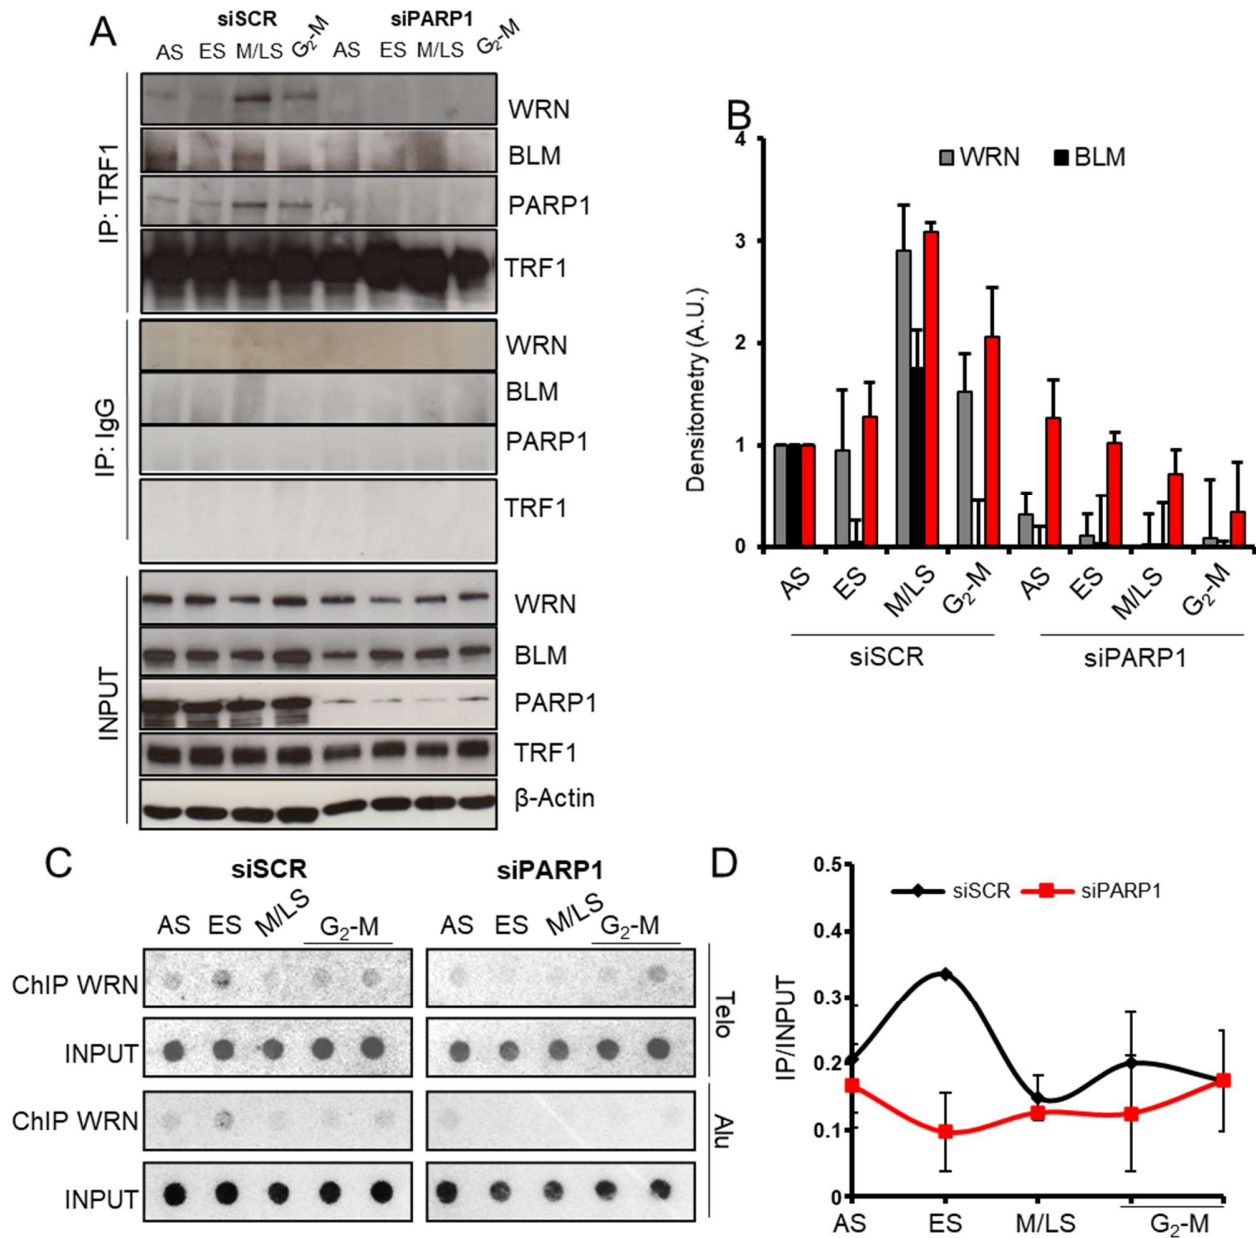

309

310 **Figure 8: PARP1 inhibition impairs WRN and BLM recruitment by TRF1 during S-phase.** A, HeLa cells interfered for  
 311 PARP1 and synchronized as above reported were immunoprecipitated against TRF1 and decorated for the indicated  
 312 antigens. Densitometry of immunoprecipitated proteins, normalized on each respective input is reported as  
 313 histograms (B). Samples processed as in A underwent ChIP against WRN. Immunoprecipitated chromatin was dot  
 314 blotted and hybridized with a radiolabeled probe against telomere repeats or Alu repeats (C) Immunoprecipitated  
 315 samples signals were quantified by densitometry, normalized on each relative input, Alu signal was subtracted to each  
 316 relative sample and then reported on graphs as IP/Input ratio (D). One representative of three independent  
 317 experiments with similar results is shown. Graphs report the mean of three independent experiments, bars are SD.

318

319 **Discussion**

320 Here we unveil an unprecedented interaction between the shelterin protein TRF1 and the PARP1  
321 enzyme. PARP1 is canonically activated by DNA damage and can synthesize PAR chains on itself  
322 and on specific acceptor proteins by modifying the molecular environment around the DNA lesion  
323 facilitating repair actions. In this paper, we observed a specific function of PARP1 at telomeres  
324 during DNA synthesis that is functional to proper DNA replication. At first, we assessed a direct  
325 interaction between PARP1 and TRF1, which does not require the DNA presence and is S-phase  
326 dependent (Figure 1). In addition, we discovered that TRF1 is a substrate for PARP1-dependent  
327 covalent PARylation but is unable to bind PARs through non-covalent interaction (Figure 2). This  
328 observation allows to exclude that TRF1 could interact with auto-PARylated PARP1, sustaining the  
329 hypothesis that TRF1 is a specific PARP1 target. The functional role of PARP1 and PARylation  
330 during telomere replication was assessed by the Bromo-ChIP experiments in which it is clearly  
331 demonstrated that both the lack of the protein and the catalytic inhibition, achieved with two  
332 different PARP1 inhibitors, impair TRF1 dynamics and BrdU incorporation (Figure 3, Figure S4 and  
333 Figure S5). Since PARylation is known to add negative charges to target proteins altering protein-  
334 DNA affinity, we hypothesized that TRF1 PARylation decreases TRF1 binding to DNA duplex  
335 facilitating the access of the replisome. In agreement with this finding, the EMSA assay confirmed  
336 that PARylation by PARP1 impairs TRF1 binding to telomeric duplex (Figure 4D). Moreover, since  
337 TRF1/PARP1 affinity was increased by DNA degradation (in presence of EtBr, Figure 1 B), we could  
338 infer that, during the fork passage, PARylated TRF1, displaced from DNA duplex, can form  
339 multiprotein complexes recruiting WRN and BLM helicases to unwind secondary structures such  
340 as G-quadruplex formed on the lagging strand of the proceeding fork. Both BLM and WRN are  
341 covalent and non-covalent PARs binders cooperating with PARP1 in maintaining DNA integrity  
342 [20]. This means that they can interact with PARP1 via protein-protein interaction, or with  
343 PARylated substrates via non-covalent interaction (here TRF1). This suggests a model in which  
344 PARP1, while binding and PARylating TRF1 to remove it from the telomeric duplex during fork  
345 passage, also allows recruitment of both BLM and WRN, by protein-protein interaction or by PARs-  
346 mediated interaction, to remove secondary structures forming on the G-rich lagging strand (Figure  
347 9). In agreement with this, PARP1 interference completely abrogates the recruitment of WRN and  
348 BLM by TRF1 during S-phase (Figure 8 A and 8 B). The consequence of the lack of helicase  
349 recruitment generates a replication dependent DNA damage confirmed by the transient activation

350 of  $\gamma$ H2AX and RPA phosphorylation, which indicates the presence of a single stranded DNA lesion  
351 due to ongoing DNA repair. The cell cycle distribution is overall unaffected in PARP1 interfered  
352 cells, suggesting that PARP1 inhibition does not affect the whole DNA synthesis. However, the S-  
353 phase length analysis, performed by a BrdU pulse incorporation, evidenced a delay of S-phase that  
354 is coherent with a perturbation of DNA synthesis localized at telomeres. Of note, DDR activation  
355 is not visible in U2OS upon PARP1 interference. Surprisingly, while siTRF1 is still able to induce  
356 DDR in U2OS, both TRF1 and PARP1 depletion are not effective in inducing telomere fragility  
357 (Figure 6 and 7). U2OS are known to activate alternative mechanisms of telomere length  
358 maintenance involving break-induced replication (BIR). ALT cells are characterized by long and  
359 heterogeneous telomeres with different epigenetic structure. ALT cells display high replication  
360 stress at telomeres, which triggers frequent recombination and telomere elongation through  
361 different mechanisms [23]. It has been recently reported that ALT cells display telomere fragility  
362 at least in part caused by BIR events, in which BLM takes part, and that alt-Non Homologous End  
363 Joining suppresses BIR and telomere fragility in non-ALT cells [24]. Nevertheless, here we found  
364 that neither TRF1 nor PARP1 depletion led to the formation of fragile telomeres in ALT cells,  
365 unveiling new levels of complexity for these mechanisms.

366 Other authors reported that a stable PARP1 knock-out triggered loss of telomere repeats and DDR  
367 induction in colon cancer cells [25]. Apart of telomere doublets, here we did not observe a  
368 reduction of telomere length or an increase of other telomeric defects (Figure 6 and S8), but this  
369 could be explained by the fact that we analyzed cells in the first round of duplication after a  
370 transient knock-down. In addition, the double TRF1/PARP1 interference had the same effect of  
371 the single ones indicating that TRF1 knock-down phenotype is recapitulated by PARP1 inhibition.  
372 This evidence strongly supports the idea that helicase recruitment is dependent on PARP1 and/or  
373 PARylation, at least in telomerase positive cells, and is at the basis of the telomere replication  
374 defects observed upon TRF1 knock-down. Terminal forks are supposed to frequently pause and  
375 stall, especially in actively replicating cells, as tumor cells are. We can reasonably suppose that a  
376 PARP1 “surveillance” activity is required during telomeric DNA synthesis.

377 In conclusion, this work provides mechanistic insights on how PARP1 orchestrates the molecular  
378 events occurring at replicating telomeres through covalent modification of TRF1 and recruitment  
379 of BLM and WRN helicases. The PARP1 “surveillance” seems to be specific for non-ALT cells, which

380 display less replication stress and more stable genotypes suggesting that the PARP1 “surveillance”  
381 could be lost in cancer evolution along with the increase of genetic instability.

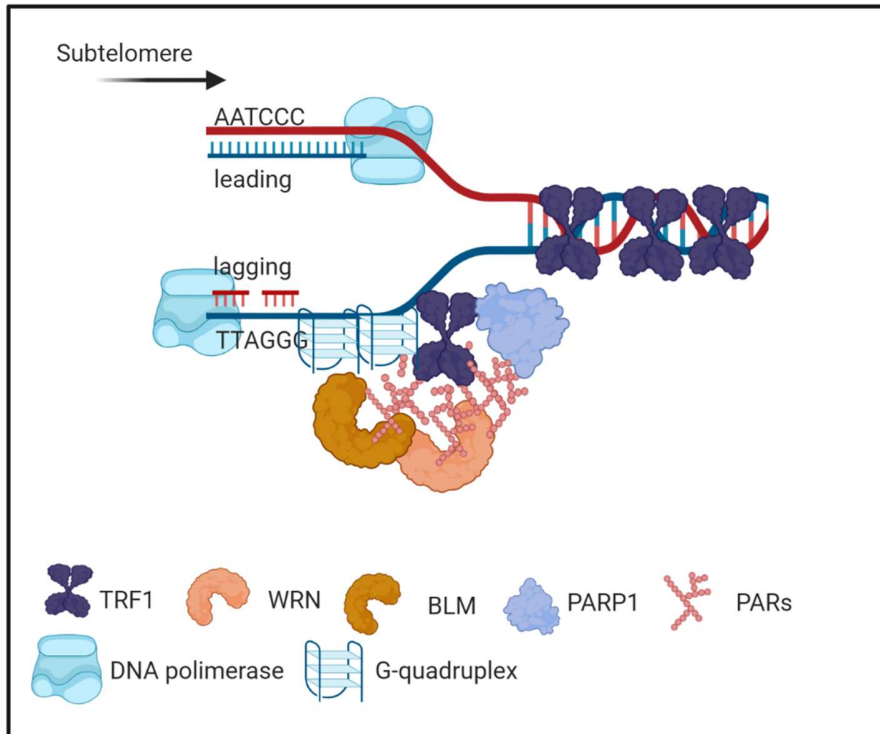

382

383 **Figure 9: Model for TRF1/PARP1/RecQ helicases interplay during telomere replication.** PARP1 PARylated TRF1 has  
384 lower affinity for DNA duplex and is recruited in a complex with BLM and WRN that resolve secondary structures  
385 forming at the G-rich lagging strand. Created in BioRender.com.

386

## 387 **Materials and methods**

### 388 *Cell cultures, transfections, and treatments*

389 Human cervical cancer cells (HeLa), BJ human fibroblasts and human osteosarcoma cells (U2OS)  
390 were purchased from ATCC repository. BJ EHLT were obtained by retroviral transduction of BJ  
391 cells with hTERT (Addgene plasmid #1773) and Large T SV40 antigen (Addgene plasmid # 21826)  
392 as described. Cells were maintained in Dulbecco Modified Eagle Medium supplemented with 10%  
393 fetal calf serum, 2 mM L-glutamine, and antibiotics. In synchronization experiments, cells were  
394 seeded at 40% confluence and exposed to 2 mM thymidine (T-1895, SIGMA) for 16 h (I block),  
395 followed by 8 h release in fresh medium, and again exposed to 2 mM thymidine for additional 16

396 h (II block). Then cells were released in fresh medium and collected by trypsinization at different  
397 time points for further analysis. RNAi was performed by transfecting cells 2 days before  
398 synchronization at 20% confluence with 5 nM siRNA (scrambled sequence, two different  
399 sequences against PARP1 and TRF1: PARP1 siRNA Origene SR300098B/C, TRF1 siRNA Origene  
400 SR322000B/C, SCR siRNA Origene SR30004 and POLYPLUS INTERFERIN #409-10 as Transfection  
401 reagent).

#### 402 *Flow cytometry*

403 Cell cycle analysis was performed by flow cytometry (Becton-Dickinson) after cellular staining with  
404 propidium iodide (PI), as previously described [14][15]. After culturing and treatment, cells were  
405 harvested, washed with PBS twice, fixed in 70% ethanol at 4 °C overnight. Then, cells were washed  
406 with PBS twice, stained with PI at a final concentration of 50 µg/mL and RNase at a final  
407 concentration of 75 kU/mL, incubated for 30 min, then analyzed by FACSCalibur and FACSCelesta  
408 (BD Biosciences, San Jose, CA, USA). Progression of cells through the cell cycle phases was analyzed  
409 by simultaneous flow cytometric measurements of DNA and 5-bromo-2'-deoxyuridine (BrdU)  
410 contents of cells, as previously described (Biroccio et al. 2001). Briefly, cells were pulsed with BrdU  
411 (Sigma Aldrich) at a final concentration of 20 µM for 15 min, and after the appropriate intervals in  
412 BrdU-free medium (from 2.5 to 24 h) the DNA was denatured. Cells were then incubated with 20  
413 µl of the mouse Mab-BrdU (347580 Pure BD) for 1 h at room temperature, and BrdU-labeled cells  
414 were detected using goat anti-Mouse Fab'2 Alexa Fluor 488 (Cell Signaling). The cells were  
415 counterstained with PI, acquired and analyzed with BD FACS Diva Software.

#### 416 417 *Immunoprecipitation and western blot*

418 Cells treated as above were collected and lysed in nuclei isolation buffer (10 mM Hepes pH 7.5,  
419 10 mM KCl, 0.1 EDTA, 0.1 mM EGTA, 0.1 mM DTT, protease and phosphatase inhibitors). Nuclei  
420 were isolated by centrifugation and lysed in high salt RIPA buffer (50 mM Tris-HCl pH7.4, 330 mM  
421 NaCl, protease and phosphatase inhibitors). For immunoprecipitation, 500 µg of proteins were  
422 incubated with 4 µg of goat IgG, anti-TRF2 (Mouse Mab Millipore 05521), anti-TRF1 antibody (Goat  
423 Pab sc-1977, SantaCruz), or anti-PAR (Mouse Mab 10H ALX-804220, Alexis) recovered with  
424 Protein-G dynabeads (Invitrogen), run on PAGE together with input sample (1:20 of amount of  
425 immunoprecipitated proteins) and blotted with anti-PARP1 (Mouse Mab 551025 BD Pharmigen),

426 anti-TRF1 (Rabbit Pab sc-6165, Santa Cruz), anti-Tankyrase1 (Mouse Mab IMEGENEX IMG-146), or  
427 anti-PAR (mouse Mab 10H ALX-804220, Alexis);  $\beta$ -actin was used as a loading control (mouse Mab  
428 Sigma A2228). Five U/ $\mu$ g DNA of DNase (Roche) or ethidium bromide (1%) were added in the lysate  
429 before immunoprecipitation with anti-TRF1 antibody (goat Pab sc-1977, SantaCruz).

#### 430 *Protein expression and purification.*

431 His-tagged human wild-type (wt) and delta-acidic TRF1 were expressed in Escherichia coli  
432 BL21(DE3) by using pTrc-HisB vectors (a kind gift of Prof. Eric Gilson, University of Nice-Sophia  
433 Antipolis, Nice). TRF1 mutants expression was induced at an OD 600 of 0.3–0.4 with 1 mM IPTG,  
434 followed by an incubation for 4 h at 37°C. After centrifugation, cells were resuspended in lysis  
435 buffer [50 mM sodium phosphate pH 7.2, 300 mM NaCl, 10 mM imidazole, 1 mg/ml lysozyme,  
436 PMSF]. Cells were sonicated and the insoluble fraction was removed by centrifugation at 15,000  
437 g for 30 min. The soluble fraction was loaded on 1.5 ml of HisPur™ Ni-NTA Resin (Thermo Fisher  
438 scientific Inc.) and incubated 1 hour at 4°C on rotation. Elution was performed with 250 mM  
439 imidazole in a buffer consisting of 50 mM sodium phosphate pH 7.2, 300 mM NaCl. Elution fraction  
440 was run on PAGE and quantified by Coomassie staining.

#### 441 *Heteromodification of HIS-hTRF-1 isoforms by PARP1*

442 For the analysis of TRF1 PARylation by PARP-1 [16], beads were pelleted (160 ng of hTRF-  
443 1/sample) and re-suspended in activity buffer containing 5 units of hPARP-1 (High Specific Activity,  
444 Trevigen), 2.5  $\mu$ g DNase I-activated calf thymus DNA, 200 mM NAD<sup>+</sup>, Tris-HCl pH 8, 10 mM MgCl<sub>2</sub>  
445 and 2 mM dithiothreitol. In control samples hPARP-1 or hTRF-1 were omitted. Reaction specificity  
446 was evaluated by adding to the reaction mixture 1 mM of the PARP inhibitor olaparib  
447 (Selleckchem). As positive control of PAR covalently bound to an acceptor protein, 10  $\mu$ g of  
448 histones (Merck Millipore) were added to the reaction mixture containing PARP-1. After 30 min  
449 of incubation at 25°C, the reaction was stopped by the addition of Laemmli sample buffer and  
450 samples were analyzed by gel electrophoresis on 8% SDS-PAGE and Western blot. PARylated  
451 PARP-1, TRF-1 or histones were detected using anti-PAR monoclonal antibody (Trevigen) and  
452 input TRF1 mutants were revealed with anti-His (anti 6-His Rabbit Pab Sigma Aldrich). For the  
453 detection of biotin-labelled PARylated proteins the same assay was conducted in presence of  
454 biotin-NAD<sup>+</sup> (Sigma Aldrich) followed by SDS-PAGE and western blot detection with anti-  
455 streptavidin HRP antibody (Molecular Probes).



456 *Synthesis of PAR and non-covalent PAR binding*

457 Synthesis of PAR was performed as previously reported [17]. Briefly, 50 units of purified human  
458 PARP-1 (High Specific Activity hPARP-1, Trevigen) were incubated in a mixture containing 100 mM  
459 Tris-HCl pH 8, 10 mM MgCl<sub>2</sub>, 2 mM dithiothreitol, 2.5 µg of DNase I-activated calf thymus DNA  
460 (Trevigen) and 200 mM NAD<sup>+</sup> (Sigma-Aldrich) for 45 min at 30°C. The reaction was stopped by  
461 adding ice-cold trichloroacetic acid (TCA) to a final concentration of 20% (w/v). PARs were  
462 detached from proteins by incubation in 50 mM NaOH and 10 mM EDTA for 1 h at 60°C. After  
463 adjustment of pH to 7.5, PAR were purified by phenol/chloroform extraction as described [17].

464 For the study of non-covalent interaction of PAR with TRF-1, graded concentrations of purified  
465 His-hTRF1 protein were immobilized directly by slot-blotting on nitrocellulose membrane. Histone  
466 H1 (Millipore) was used as positive control in the PAR binding assay. Subsequently, filters were  
467 incubated with PAR diluted in TBS-T (10 mM Tris-HCl pH 8.0, 150 mM NaCl, 0.1% Tween 20) for 1  
468 h at room temperature. After high-stringency salt washes, protein bound PAR were detected using  
469 anti-PAR monoclonal antibody (mouse Mab ALX-804220).

470 *ChIP and BrdU-ChIP*

471 ChIP was performed after double thymidine blockade and PARP1 and TRF1 RNAi. Olaparib 2 µM  
472 (AZD2281 Selleckchem) and NU1025 200 µM (Sigma Aldrich) were given to cells during release  
473 from cell cycle blockade. Cells were collected every 2 hours post-release after addition of  
474 formaldehyde (1%) directly to culture medium for 10 min at R.T. and sonicated chromatin (80  
475 µg/sample) was immunoprecipitated (IP) overnight at 4°C with 4 µg of the anti-TRF1 antibody  
476 (goat Pab sc-1977, Santa Cruz) or the anti-WRN antibody (Rabbit Pab NB100-471, Novus  
477 Biologicals). Crosslink was then reversed with NaCl 5 M and DNA was extracted with phenol-  
478 chloroform method. Brdu-ChIP was performed after addition of 20 µM BrdU (5-bromo-2'-  
479 deoxyuridine, Sigma Aldrich) directly to HeLa culture medium for 1 h, then cells were collected  
480 and 60 µg of sonicated chromatin was incubated overnight at 4°C with 20 µl of the anti-BrdU  
481 antibody (347580 Pure BD). Then, IP was performed as described above. After precipitation with  
482 each antibody, the precipitants were blotted onto Hybond-N membrane (Amersham), and  
483 telomeric repeat sequences were detected with a Telo probe (TTAGGG). A nonspecific probe (Alu)  
484 was also used. To verify that an equivalent amount of chromatin was used in the  
485 immunoprecipitated, samples representing the 0.1%, 0.01%, and 0.001% of the total chromatin

486 (input) were included in the dot blot. The filter was exposed to a PhosphorImager screen (Bio-  
487 Rad), and the signals were measured using ImageQuant software (Quality One; Bio-Rad).

#### 488 *Electro Mobility Shift Assay (EMSA)*

489 Telomeric duplex DNA 5'-  
490 GGGTTAGGGTTAGGGTTAGGGTTAGGGTTAGGGTTAGGGTTAGGGCCCCCTC-3' and antisense (5'-  
491 GAGGGGCCCTAACCTAACCTAACCTAACCTAACCTAACCTAACCTAACCC-3' was end-labeled with [ $\gamma$ -  
492  $^{32}$ P]ATP (Amersham Biosciences) and T4-polynucleotide kinase (New England BioLabs) and  
493 purified from free nucleotides through G25 spin columns (GE Healthcare). Binding was carried out  
494 by incubating 0.5 ng of labelled DNA with 1  $\mu$ g of unmodified or PARP1 covalently PARylated TRF1  
495 (as above described) in 15  $\mu$ l of a reaction mix of 20-mM Hepes (pH 7.9), 100-mM NaCl, 50-mM  
496 KCl, 1-mM MgCl<sub>2</sub>, 0.1-mM ethylenediaminetetraacetic acid (EDTA), 1 mM DTT, 5% (v/v) glycerol,  
497 0.5 mg/ml of BSA and 0.1% (v/v) NP-40. Samples were incubated at 4°C for 90 min and then run  
498 on native 4.5% polyacrylamide gels. Gels were dried and exposed to PhosphorImager screens and  
499 acquired using ImageQuant (Bio-Rad), and the signals were measured using ImageQuant software  
500 (Quality One; Bio-Rad).

#### 501 *PLA, IF-FISH and FISH in metaphase*

502 For Proximity Ligation Assay (PLA) staining, HeLa cells, synchronized as above described, were  
503 fixed in 2% formaldehyde and permeabilized in 0.25% Triton X-100 in PBS for 5 min at room  
504 temperature at each endpoint. Then, samples were processed for immunolabeling with anti-TRF1  
505 (rabbit Pab sc-6165, Santa Cruz) and anti-PARP1 (Mouse Mab ALX-804-211-R050, Enzo Life  
506 science) antibodies. PLA was performed by using the DUOLINK<sup>®</sup> In situ detection reagents Red  
507 (Sigma-Aldrich) following the manufacturer's instructions. For IF-FISH staining, cells, fixed and  
508 permeabilized as indicated above, were immunostained with mouse anti-phospho-Histone H2AX  
509 (Ser139) (clone JBW301, Merk Millipore) or anti p-S4/S8 RPA (Rabbit Pab Bethyl A300-245A)  
510 monoclonal antibodies followed by the by the anti-mouse IgG Alexa fluor 488 or anti-rabbit IgG  
511 Alexa fluor 555 secondary antibody (Cell Signaling). Then samples were re-fixed in 2%  
512 formaldehyde, dehydrated with ethanol series (70, 90, 100%), air dried, co-denatured for 3 min  
513 at 80°C with a Cy3-labeled PNA probe, specific for telomere sequences (TelC-Cy3, Panagene,  
514 Daejon, South Korea), and incubated for 2 h in a humidified chamber at room temperature in the  
515 dark. After hybridization, slides were washed with 70% formamide, 10 mM TrisHCl pH7.2, BSA

516 0.1%, and then in TBS/Tween 0.08%, dehydrated with ethanol series, and finally counterstained  
517 with DAPI (0.5  $\mu\text{g/ml}$ , Sigma-Aldrich) and mounting medium (Gelvatol Moviol, Sigma Aldrich).  
518 Images were captured at 63 $\times$  magnification with a Leica DMIRE deconvolution microscope  
519 equipped with a Leica DFC 350FX camera and elaborated by a Leica LAS X software (Leica, Solms,  
520 Germany). This system permits to focus single planes inside the cell generating 3D high-resolution  
521 images. For telomere doublets analysis, chromosome spreads were obtained following 4 h  
522 incubation in colchicine 5  $\mu\text{M}$  (Sigma-Aldrich) and prepared following standard procedure  
523 consisting of treatment with a hypotonic solution (75 mM KCl) for 20 min at 37  $^{\circ}\text{C}$ , followed by  
524 fixation in freshly prepared Carnoy solution (3:1 v/v methanol/acetic acid). Cells were then  
525 dropped onto slides, air dried, and utilized for cytogenetic analysis. Staining of centromeres and  
526 telomeres was performed as previously described [18] using the TelC-Cy3 PNA probe, and an  
527 Alexa488-labeled PNA probe specific for the human alphoid DNA sequence to mark centromeres  
528 (Cent-Alexa488) (both from Panagene, Daejon, South Korea). Metaphase images were captured  
529 using an Axio Imager M1 microscope (Zeiss, Jena, Germany) and the ISIS software (Metasystems,  
530 Milano, Italy). A total of 100 metaphases were analyzed for each sample in, at least, three  
531 independent experiments. Telomere length was calculated as the ratio between the relative  
532 fluorescence intensity of each telomere signal (T) and the relative fluorescence intensity of the  
533 centromere of chromosome 2 (C) and expressed as percentage (T/C %)[19].

### 534 **Acknowledgements**

535 **General:** I would like to thank Prof. Eric Gilson and Prof. Stefano Cacchione for their generous  
536 advices and suggestions and for sharing reagents and Mr. Rocco Fraioli for technical assistance in  
537 EMSA assay.

538 **Funding:** We gratefully acknowledge the Italian Association for Cancer Research for financial  
539 support [Grant 16910 to A.B.,17121 to E.S]. E.P. and L.P. were recipients of a fellowship from the  
540 Italian Association for Cancer Research (AIRC)

541 **Author contributions**<sup>[Office2]</sup>: Conceptualization, S.E., S.A., A.A. G.G. and B.A.; methodology,  
542 validation, formal analysis, data curation, M.C., D.S.A., D.C., B.F., P.E., V.E., P.L., S.E.;  
543 investigation, D.S.A., M.C., D.C., P.E., V.E., P.L., B.A., and S.E.; writing original draft  
544 preparation, S.E.; writing review and editing, S.E., B.A., A.A., S.A., P.E., G.G.; visualization, S.E.,  
545 B.A.; supervision, S.E., B.A.; project administration, S.E.; funding acquisition, S.E. and B.A.

546 **Competing interests:** The authors declare no competing interests.

547 **Data availability statement:** Raw data are available at:

548 <https://gbox.garr.it/garrbox/index.php/s/LJjfkvEA0tvYsf8>

549

## 550 **References**

- 551 [1] W. Palm and T. de Lange, "How Shelterin Protects Mammalian Telomeres," *Annu. Rev.*  
552 *Genet.*, vol. 42, no. 1, pp. 301–334, Dec. 2008, doi:  
553 10.1146/annurev.genet.41.110306.130350.
- 554 [2] T. de Lange, "Shelterin-Mediated Telomere Protection," *Annu. Rev. Genet.*, vol. 52, no. 1,  
555 pp. 223–247, Nov. 2018, doi: 10.1146/annurev-genet-032918-021921.
- 556 [3] P. L. Opresko, C. Von Kobbe, J. P. Laine, J. Harrigan, I. D. Hickson, and V. A. Bohr,  
557 "Telomere-binding protein TRF2 binds to and stimulates the Werner and Bloom syndrome  
558 helicases," *J. Biol. Chem.*, vol. 277, no. 43, pp. 41110–41119, Oct. 2002, doi:  
559 10.1074/jbc.M205396200.
- 560 [4] M. Zimmermann, T. Kibe, S. Kabir, and T. de Lange, "TRF1 negotiates TTAGGG  
561 repeat-associated replication problems by recruiting the BLM helicase and the TPP1/POT1  
562 repressor of ATR signaling," *Genes Dev.*, vol. 28, no. 22, pp. 2477–2491, Nov. 2014, doi:  
563 10.1101/gad.251611.114.
- 564 [5] A. Sfeir *et al.*, "Mammalian Telomeres Resemble Fragile Sites and Require TRF1 for  
565 Efficient Replication," *Cell*, vol. 138, no. 1, pp. 90–103, Jul. 2009, doi:  
566 10.1016/j.cell.2009.06.021.
- 567 [6] P. Martínez *et al.*, "Increased telomere fragility and fusions resulting from TRF1 deficiency  
568 lead to degenerative pathologies and increased cancer in mice," *Genes Dev.*, vol. 23, no.  
569 17, pp. 2060–2075, Sep. 2009, doi: 10.1101/gad.543509.
- 570 [7] A. Mendez-Bermudez *et al.*, "Genome-wide Control of Heterochromatin Replication by  
571 the Telomere Capping Protein TRF2," *Mol. Cell*, vol. 70, no. 3, pp. 449–461.e5, May 2018,

- 572 doi: 10.1016/j.molcel.2018.03.036.
- 573 [8] K. Martin-Hernandez, J. M. Rodriguez-Vargas, V. Schreiber, and F. Dantzer, "Expanding  
574 functions of ADP-ribosylation in the maintenance of genome integrity," *Seminars in Cell  
575 and Developmental Biology*. 2017, doi: 10.1016/j.semcd.2016.09.009.
- 576 [9] H. E. Bryant *et al.*, "Specific killing of BRCA2-deficient tumours with inhibitors of poly(ADP-  
577 ribose) polymerase," *Nature*, vol. 434, no. 7035, pp. 913–917, Apr. 2005, doi:  
578 10.1038/nature03443.
- 579 [10] Y. Doksani and T. de Lange, "Telomere-Internal Double-Strand Breaks Are Repaired by  
580 Homologous Recombination and PARP1/Lig3-Dependent End-Joining," *Cell Rep.*, vol. 17,  
581 no. 6, pp. 1646–1656, Nov. 2016, doi: 10.1016/j.celrep.2016.10.008.
- 582 [11] M. Gomez *et al.*, "PARP1 is a TRF2-associated poly(ADP-ribose)polymerase and protects  
583 eroded telomeres," *Mol. Biol. Cell*, vol. 17, no. 4, pp. 1686–1696, Apr. 2006, doi:  
584 10.1091/mbc.E05-07-0672.
- 585 [12] A. Rizzo *et al.*, "Stabilization of quadruplex DNA perturbs telomere replication leading to  
586 the activation of an ATR-dependent ATM signaling pathway," *Nucleic Acids Res.*, vol. 37,  
587 no. 16, pp. 5353–5364, Jul. 2009, doi: 10.1093/nar/gkp582.
- 588 [13] E. Salvati *et al.*, "PARP1 is activated at telomeres upon G4 stabilization: Possible target for  
589 telomere-based therapy," *Oncogene*, vol. 29, no. 47, pp. 6280–6293, Nov. 2010, doi:  
590 10.1038/onc.2010.344.
- 591 [14] A. Biroccio, B. Benassi, S. Amodei, C. Gabellini, D. Del Bufalo, and G. Zupi, "c-Myc down-  
592 regulation increases susceptibility to cisplatin through reactive oxygen species-mediated  
593 apoptosis in M14 human melanoma cells," *Mol. Pharmacol.*, vol. 60, no. 1, pp. 174–182,  
594 Jul. 2001, doi: 10.1124/mol.60.1.174.
- 595 [15] G. Citro *et al.*, "c-myc antisense oligodeoxynucleotides enhance the efficacy of cisplatin in  
596 melanoma chemotherapy in vitro and in nude mice," *Cancer Res.*, vol. 58, no. 2, pp. 283–  
597 289, Jan. 1998, Accessed: Jan. 03, 2021. [Online]. Available:  
598 <https://pubmed.ncbi.nlm.nih.gov/9443406/>.

- 599 [16] M. Malanga and F. R. Althaus, "Poly(ADP-ribose) Reactivates Stalled DNA Topoisomerase I  
600 and Induces DNA Strand Break Resealing," *J. Biol. Chem.*, vol. 279, no. 7, pp. 5244–5248,  
601 Feb. 2004, doi: 10.1074/jbc.C300437200.
- 602 [17] M. Malanga and F. R. Althaus, "Noncovalent protein interaction with poly(ADP-ribose),"  
603 *Methods Mol. Biol.*, vol. 780, pp. 67–82, 2011, doi: 10.1007/978-1-61779-270-0\_5.
- 604 [18] F. Berardinelli *et al.*, "mFISH analysis of irradiated human fibroblasts: a comparison among  
605 radiations with different quality in the low-dose range.," *Radiat. Prot. Dosimetry*, vol. 166,  
606 no. 1–4, pp. 302–5, Sep. 2015, doi: 10.1093/rpd/ncv189.
- 607 [19] D. Muoio *et al.*, "Naphthalene diimide-derivatives G-quadruplex ligands induce cell  
608 proliferation inhibition, mild telomeric dysfunction and cell cycle perturbation in U251MG  
609 glioma cells," *FEBS J.*, vol. 285, no. 20, pp. 3769–3785, Oct. 2018, doi:  
610 10.1111/FEBS.14628.
- 611 [20] S. Veith and A. Mangerich, "RecQ helicases and PARP1 team up in maintaining genome  
612 integrity," *Ageing Research Reviews*, vol. 23, no. PA. Elsevier Ireland Ltd, pp. 12–28, Jun.  
613 22, 2015, doi: 10.1016/j.arr.2014.12.006.
- 614 [21] W. Chang, J. N. Dynek, and S. Smith, "TRF1 is degraded by ubiquitin-mediated proteolysis  
615 after release from telomeres," *Genes Dev.*, vol. 17, no. 11, pp. 1328–1333, Jun. 2003, doi:  
616 10.1101/gad.1077103.
- 617 [22] R. E. Verdun and J. Karlseder, "The DNA Damage Machinery and Homologous  
618 Recombination Pathway Act Consecutively to Protect Human Telomeres," *Cell*, vol. 127,  
619 no. 4, pp. 709–720, Nov. 2006, doi: 10.1016/j.cell.2006.09.034.
- 620 [23] L. Pompili, C. Leonetti, A. Biroccio, and E. Salvati, "Diagnosis and treatment of ALT  
621 tumors : is Trabectedin a new therapeutic option ?," pp. 1–10, 2017, doi: 10.1186/s13046-  
622 017-0657-3.
- 623 [24] Z. Yang, K. K. Takai, C. A. Lovejoy, and T. de Lange, "Break-induced replication promotes  
624 fragile telomere formation," *Genes Dev.*, vol. 34, no. 19–20, pp. 1392–1405, Oct. 2020,  
625 doi: 10.1101/gad.328575.119.

626 [25] A. Harvey *et al.*, “PARP1 is required for preserving telomeric integrity but is dispensable  
627 for A-NHEJ,” *Oncotarget*, vol. 9, no. 78, pp. 34821–34837, Oct. 2018, doi:  
628 10.18632/oncotarget.26201.

629

630

631

## Fig. S1

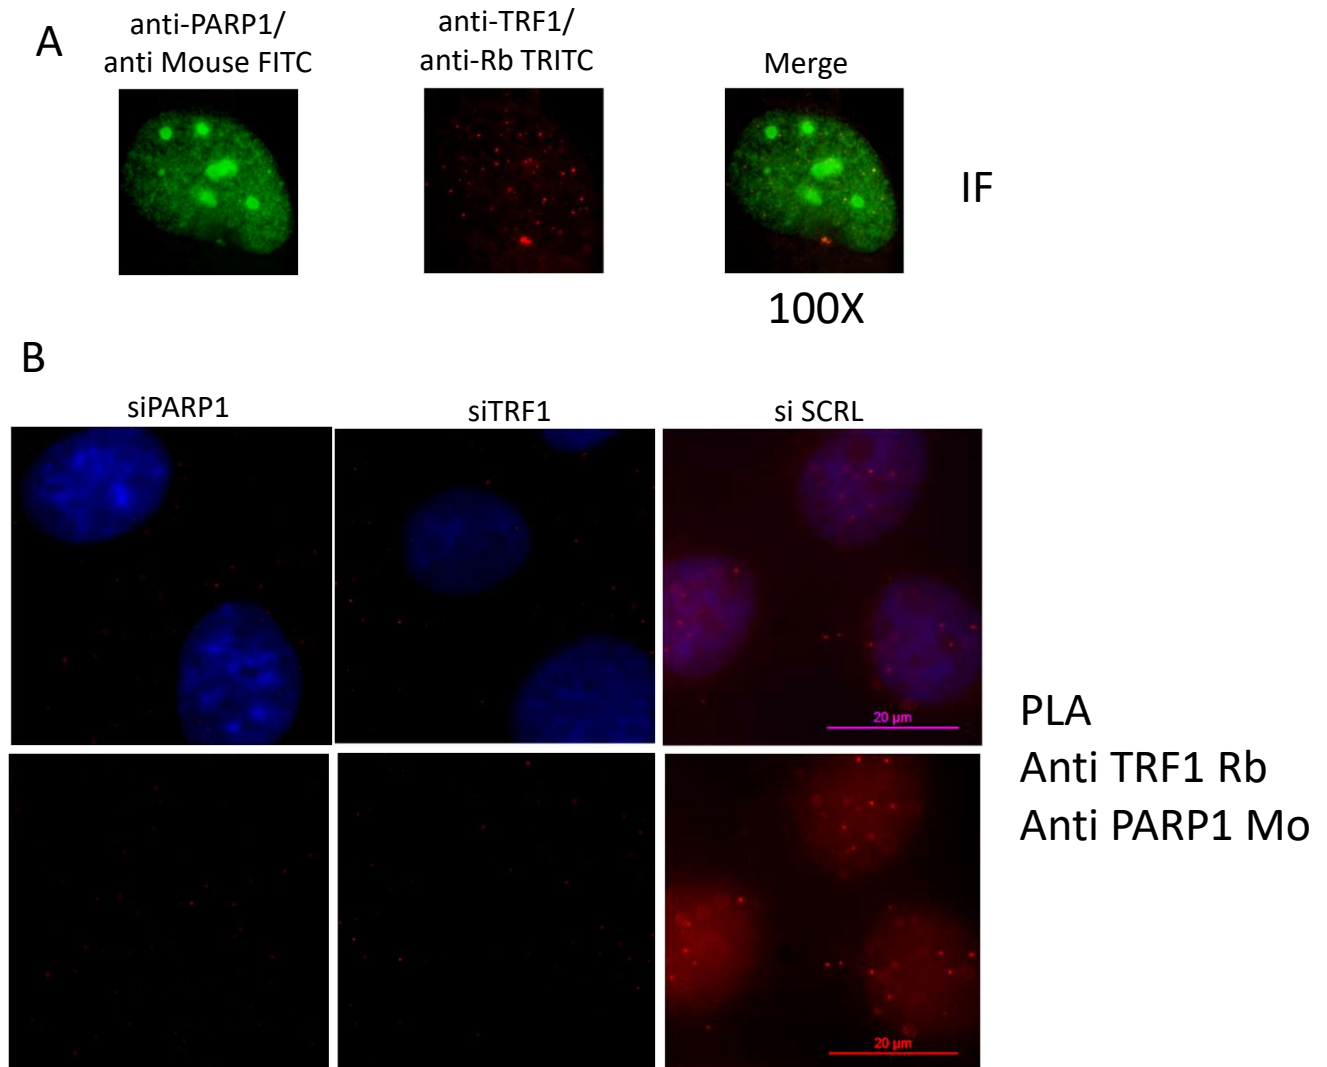

**Fig. S1. A:** HeLa cells were seeded, fixed and processed for co-immunofluorescence with anti-mouse PARP1 and anti-rabbitTRF1 specific antibodies followed by the indicated secondary antibody. Fluorescent signals corresponding to both protein staining are shown in representative images at 100X magnification. **B:** cells transfected with the indicated siRNAs were processed for co-IF with the above primary antibodies and processed for Proximity Ligation Assay with the DUOLink Red kit mouse/rabbit (Sigma). Representative images at 63X magnification are shown.



## Fig. S2

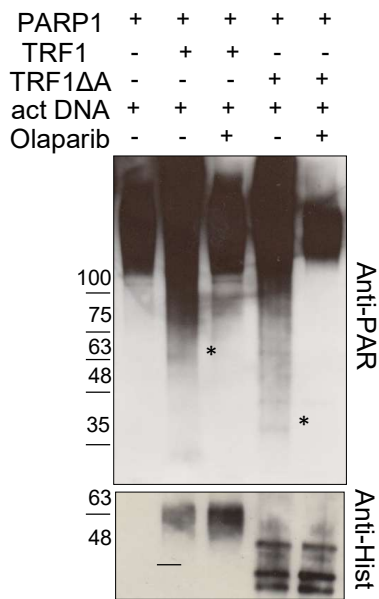

**Fig. S2** high activity purified PARP1 enzyme was incubated with NAD<sup>+</sup> in the PARylation reaction buffer in absence or presence of recombinant His-tag full length TRF1 or delta acidic TRF1 ( $\Delta$ A), with or without activating DNA or the PARP1 inhibitor Olaparib, 5  $\mu$ M (**B**). Protein mixtures were resolved on PAGE and decorated with an anti-PAR specific antibody or anti-His antibody to detect TRF1 isoforms where present..

Fig. S3

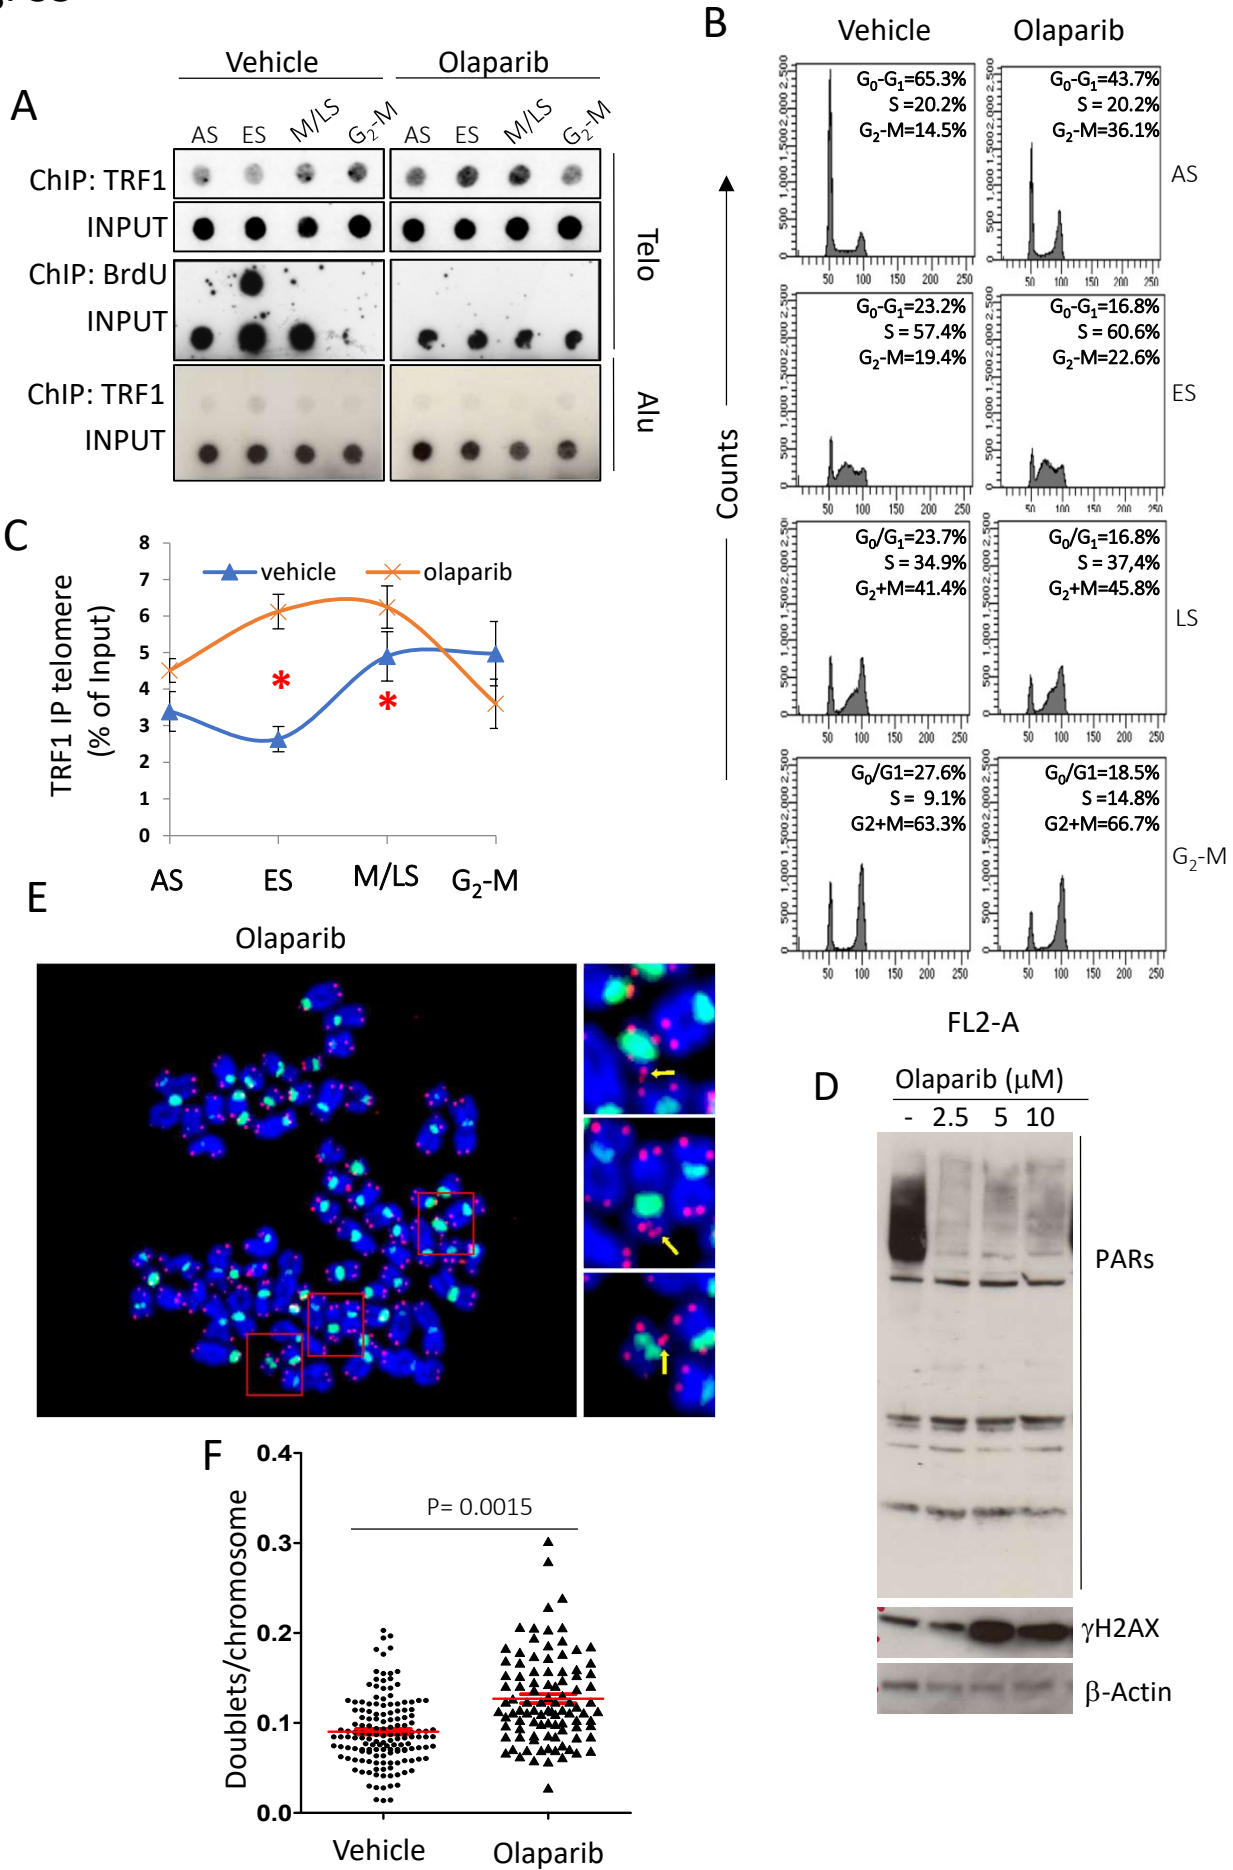

**Fig. S3. Olaparib perturbs telomere replication and induce telomere fragility.** HeLa cells were synchronized in the early S phase by double thymidine block and then released. 2  $\mu$ M Olaparib was administered where indicated, from the second thymidine block. 1 hr pulse of BrdU incorporation was performed before sample collection at the indicated time points. Samples collected underwent ChIP with an anti-TRF1 specific antibody (**A**) or flow cytometry to control cell cycle distribution (**B**). Immunoprecipitated chromatin samples were dot blotted and processed first by western blot against BrdU, and then hybridized with  $^{32}$ P labelled telo or alu probes. Signals were quantified by densitometry and reported in graphs as the percentage of each relative input after normalization on the Alu signals. Stars indicate BrdU incorporation. (**C**). **D**: HeLa cells were treated with the indicated doses of Olaparib. Then cells were collected and processed for western blot analysis against anti-PAR antibody and  $\gamma$ -H2AX.  $\beta$ -actin was used as a loading control. **E**: representative image at 100X magnification of pantelomeric/pancentromeric FISH analysis of HeLa metaphase spread after exposure to 2  $\mu$ M Olaparib for 72 hours showing doublets formation. The number of doublets for chromosome was scored and reported in graphs in **F**.

Fig. S4

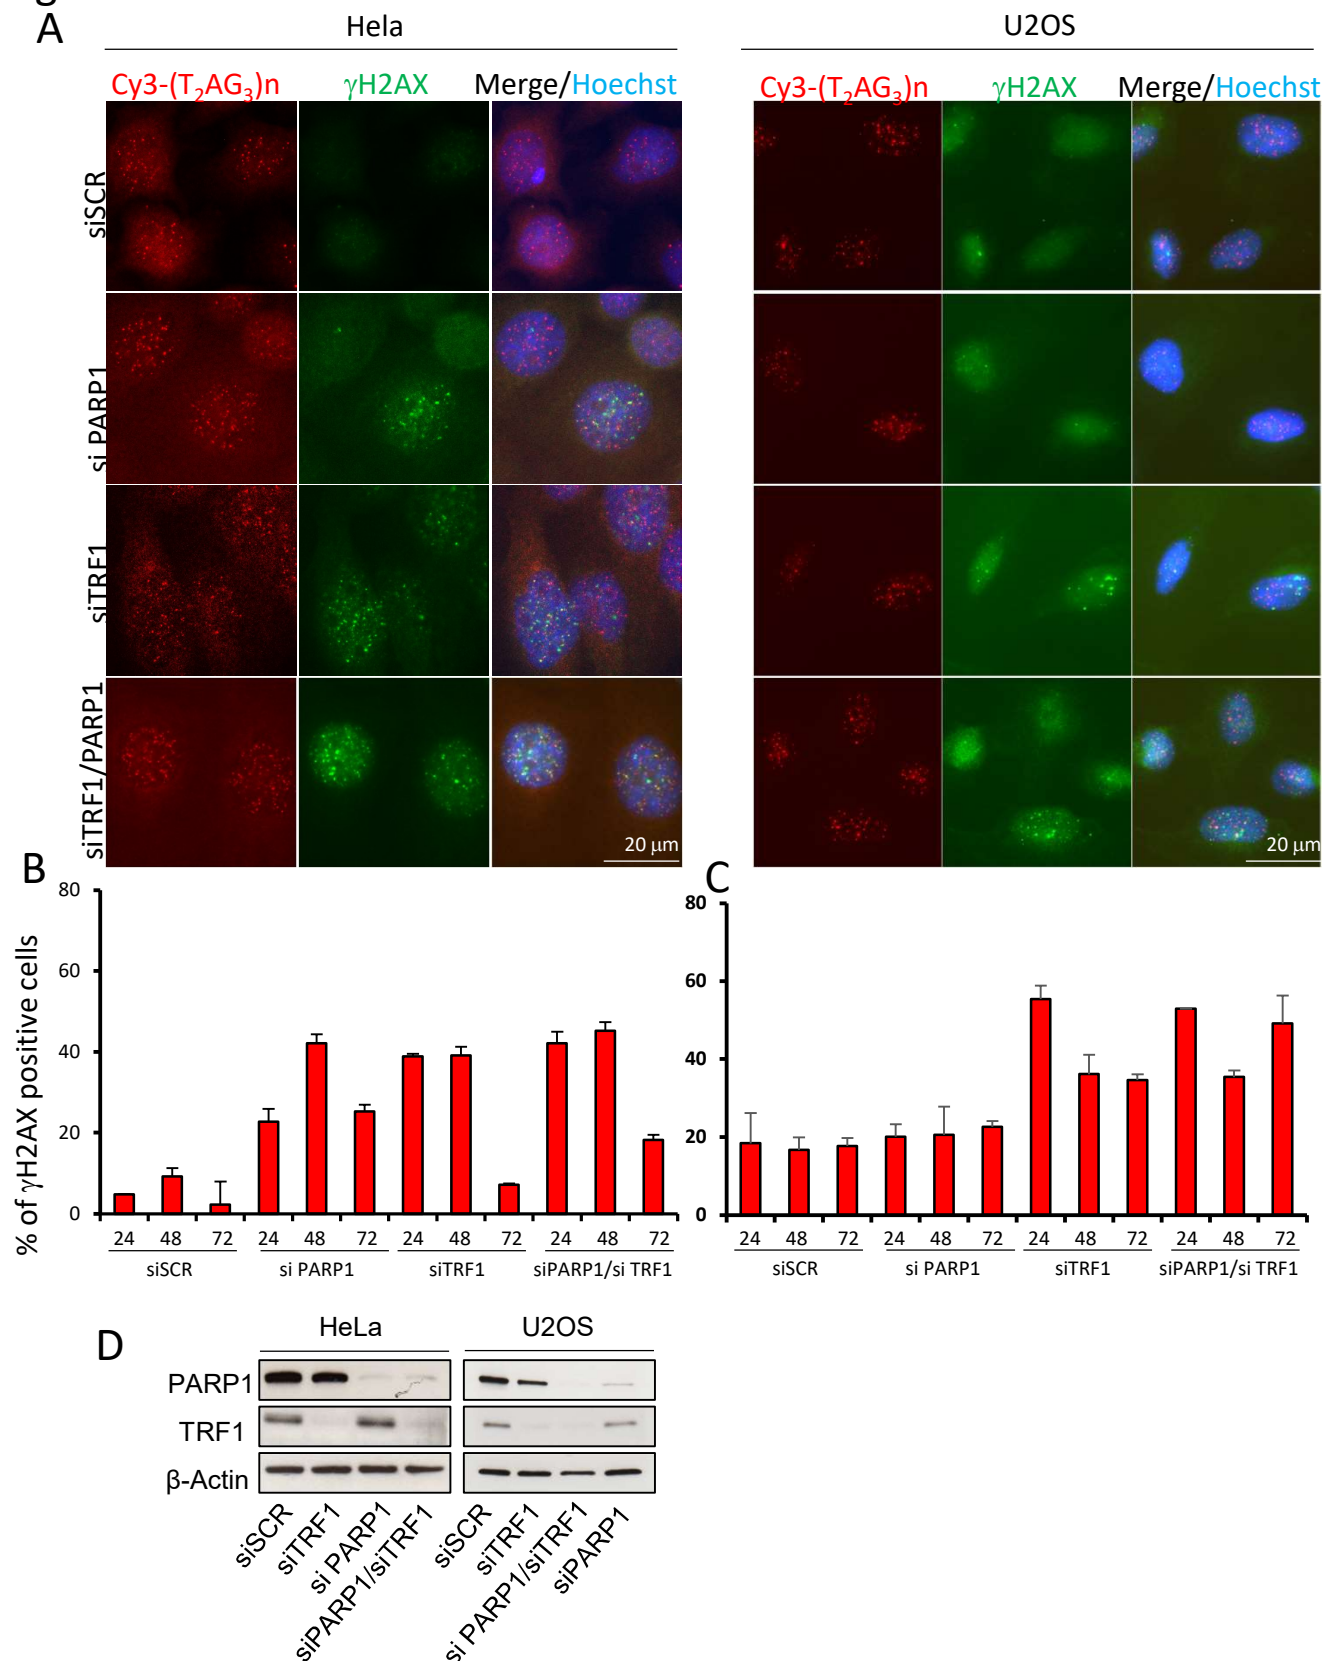

**Figure S4. siPARP1 induces DDR in HeLa but not in U2OS and its effect is epistatic to TRF1.** HeLa and U2OS cells were transfected with siRNAs against siPARP1 and siTRF1 alone and in combination and against a scrambled sequence. Then samples were fixed at the indicated endpoints after transfection and processed for IF-FISH against  $\gamma$ H2AX and telomere repeats with a Cy3-Telo PNA probe and counterstained with DAPI. Signals were acquired by Leica Deconvolution fluorescence microscope at 63X magnification (representative images are shown in panel A). The percentage of  $\gamma$ H2AX positive cells in HeLa and U2OS was scored and reported in histograms in B and C respectively. D western blot of interfered cells for the control of protein depletion. The mean of three independent experiments is shown for each sample. Bars are SD.

## Fig S5

A

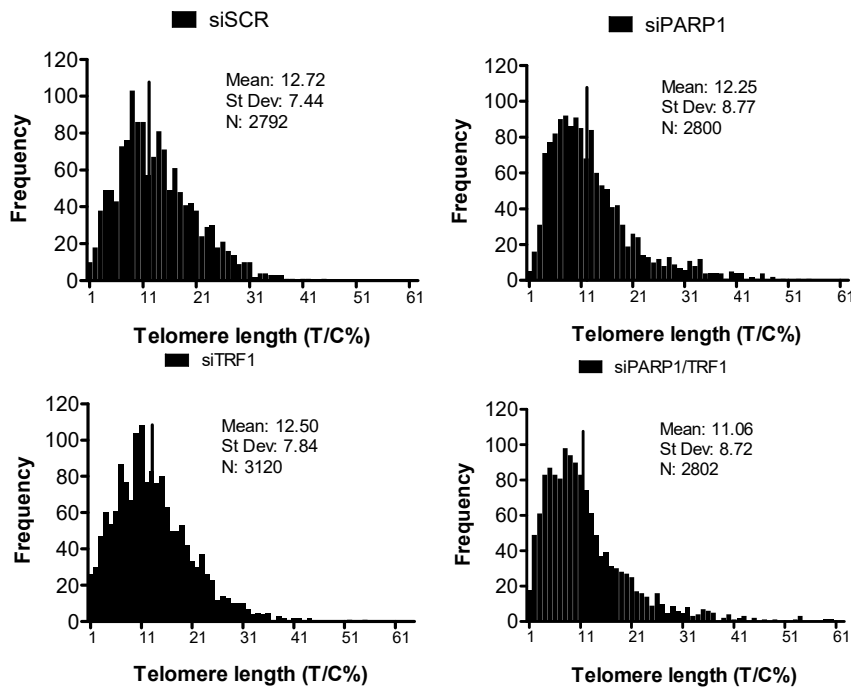

B

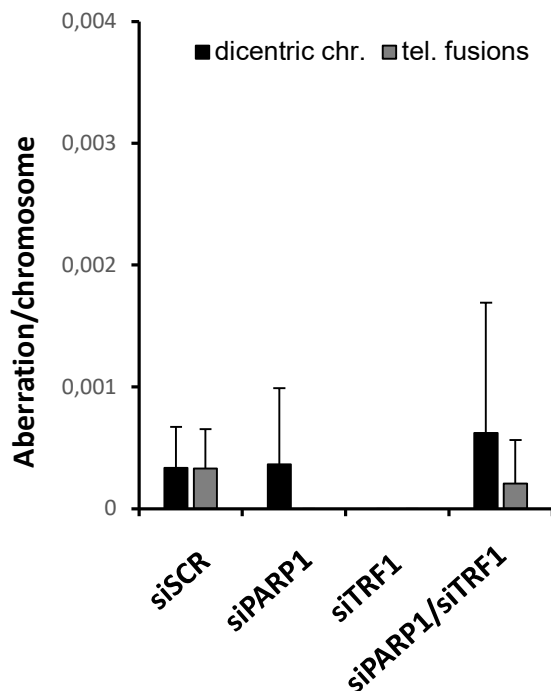

**Fig S5. Effect of TRF1/PARP1 interference on telomere length and other telomere aberrations.** HeLa cells interfered for 72 hours with the indicated siRNAs were synchronized in metaphase and processed for FISH analysis with pan-centromeric and pan-telomeric probes. Images of metaphases were acquired and analyzed for telomere length (A) and scored for the presence of dicentric chromosomes and telomeric fusions (B). As shown by the histograms, both telomere length and the number of aberrations/chromosome were not affected by transfection. (test t student  $p > 0,1$ )

## Fig S6

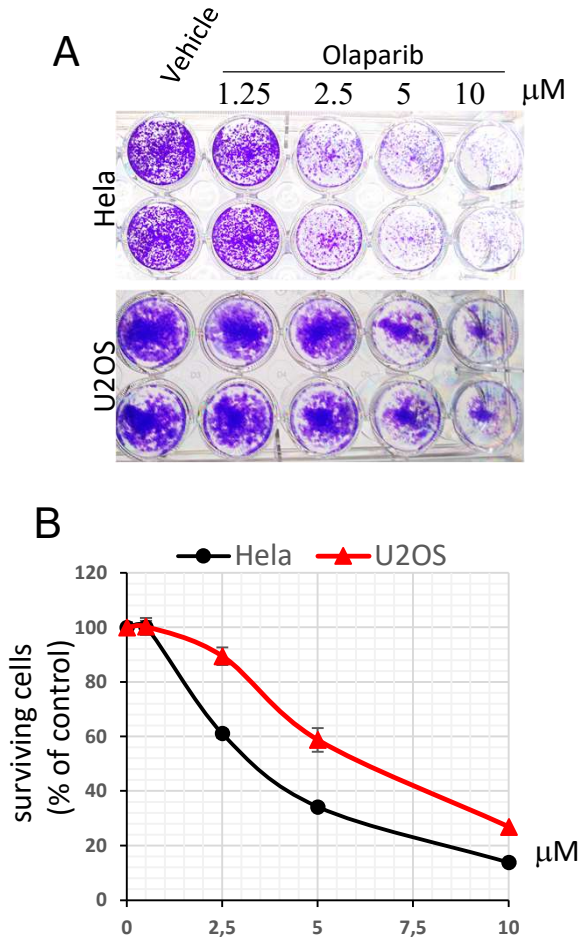

**C**

|        | ALT -            |       | ALT+             |  |
|--------|------------------|-------|------------------|--|
|        | IC <sub>50</sub> |       | IC <sub>50</sub> |  |
| HeLa   | 4.9±0.2          | U2OS  | 6.7±0.2          |  |
| HT29   | 1.33±0.1         | SW892 | 6.54±0.3         |  |
| HT1080 | 2.5±0.2          | SKBR5 | 10±0.4           |  |
| HCT116 | 3.2±0.2          | SW872 | 7.8±0.4          |  |

**Fig S6. Differential effect of Olaparib in ALT and non-ALT cells.** **A:** HeLa and U2OS cells were seeded and exposed to the indicated doses of Olaparib for 7 days. Then cells were fixed and stained with crystal violet. Representative images are shown. **B:** Samples in **A** were quantified by spectrophotometric analysis to determine cell survival. Graphs represent the percentage of surviving cells with respect to DMSO treated samples. **C:** The indicated cell lines underwent Olaparib treatment and crystal violet as above described. IC<sub>50</sub> values were calculated and reported ± standard deviation.
